# Supplementary material for: Machine-learning-assisted prediction of the size of microgels prepared by aqueous precipitation polymerization
Source: Royal Society of Chemistry journal article supplement (doi:10.1039/d4cc04386c), 2024-01-01
Supplement: d4cc04386c1.pdf [file d4cc04386c1.pdf]

## Electronic Supplementary Information

# Machine-Learning-Assisted Prediction of the Size of Microgels Prepared by Aqueous Precipitation Polymerization

Daisuke Suzuki,<sup>\*,[a][b]</sup> Haruka Minato,<sup>[a][b]</sup> Yuji Sato,<sup>[a][b]</sup> Ryuji Namioka,<sup>[b]</sup> Yasuhiko Igarashi,<sup>[c]</sup>  
Risako Shibata,<sup>[d]</sup> and Yuya Oaki<sup>\*,[d]</sup>

<sup>[a]</sup>Graduate School of Environmental, Life, Natural Science and Technology, Okayama University,  
3-1-1 Tsushimanaka, Kita-ku, Okayama, 700-8530, Japan.  
E-mail: [d\\_suzuki@okayama-u.ac.jp](mailto:d_suzuki@okayama-u.ac.jp) (D.S.)

<sup>[b]</sup>Graduate School of Textile Science & Technology, Shinshu University, 3-15-1 Tokida, Ueda,  
Nagano 386-8567, Japan

<sup>[c]</sup>Faculty of Engineering, Information and Systems, University of Tsukuba, 1-1-1 Tennodai,  
Tsukuba 305-8573, Japan

<sup>[d]</sup>Department of Applied Chemistry, Faculty of Science and Technology, Keio University, 3-14-  
1 Hiyoshi, Kohoku-ku, Yokohama 223-8522, Japan.  
E-mail: [oakiyuya@applc.keio.ac.jp](mailto:oakiyuya@applc.keio.ac.jp) (Y.O.)

## Table of Contents

### Experimental Details ..... S3-S4

Materials

Microgel synthesis

Scanning electron microscopy (SEM)

Dynamic light scattering (DLS)

Construction of the prediction model

### Results and Discussion ..... S5-S23

Table S1. List of explanatory variables

Figure S1. Representative SEM and FE-SEM images of the microgels

Figure S2. Time-correlation function of the scattering intensity and the scattering electric field ( $y_1$ )

Figure S3. Time-correlation function of the scattering intensity and the scattering electric field ( $y_2$ )

Figure S4. Five-fold cross-validation of  $y_1$

Figure S5. Five-fold cross-validation of  $y_2$

Figure S6. Results of the additional experiments to confirm the prediction model for  $y_2$

Figure S7. Five-fold cross-validation of  $y_2$  predictor using the dataset with adding the test data in

Table 2.

### References ..... S23

## Experimental Details

### Materials

*N*-isopropyl acrylamide (NIPAm, purity 98%), *N,N'*-methylenebis(acrylamide) (BIS, 97%), potassium peroxydisulfate (KPS, 95%), sodium dodecyl sulfate (SDS, 95%), hydrochloric acid solution (HCl<sub>aq</sub>), hydroxide solution (NaOH<sub>aq</sub>), and sodium chloride (NaCl, 99%) were purchased from FUJIFILM Wako Pure Chemical Corporation (Japan) and used as received. Acrylic acid (AAc, 99%) was purchased from Sigma-Aldrich and used as received. Distilled and ion-exchanged water was used for all experiments, including the preparation of solutions and dispersions (EYELA, SA-2100E1).

### Microgel synthesis

Aqueous free radical precipitation polymerization was used to synthesize 66 types of microgels according to the conditions shown in Table S1. Initially, an aqueous solution containing the monomers, NIPAm (and AAc), and the crosslinker BIS was poured into a four-necked round-bottom flask equipped with a mechanical stirrer and a reflux condenser. Subsequently, the monomer solution was heated to the constant polymerization temperature (Table S1) in an oil bath. Simultaneously, the dissolved oxygen in the solution was removed by sparging with nitrogen for at least 0.5 h. Then, the surfactant SDS and initiator KPS dissolved in water were added, respectively, to the solution to initiate the polymerization. The polymerization was allowed to proceed for 4 h, and the resultant microgel dispersion was cooled to room temperature to stop the polymerization. The obtained microgels were purified using at least two rounds of centrifugation and redispersion in water and/or by dialysis with pure water for several days.

### Scanning electron microscopy (SEM)

The morphology and size uniformity of the 70 types of microgels were evaluated using SEM (JEOL Ltd., JCM-7000) and field emission (FE)-SEM (JEOL Ltd., JSM-IT800SHL). For this purpose, droplets of diluted microgel dispersions were dropped and dried on polystyrene substrates at room temperature. Subsequently, the samples were sputtered with Pt/Pd (15 mA, 6 Pa, 80-320 s) prior to observation.

### Dynamic light scattering (DLS)

The hydrodynamic diameter ( $D_h$ ) of the 70 types of microgels was measured using DLS (Zetasizer Nano S, Malvern Instrument Ltd.). For the preparation of the samples, 1 mL of diluted microgel dispersions with 1 mM ionic strength was used after adjusting to pH = 3. The samples were measured at a constant temperature (25 °C or 40 °C); equilibration was ensured at each temperature by applying a resting period (10 min) prior to the DLS measurements. The correlation function of the scattering intensity  $g_2(\tau)$  and the correlation function of the scattering electric field  $g_1(\tau)$  are given by the following equations:

$$g_2(\tau) - 1 = \beta |g_1(\tau)|^2 \quad (\text{Eq. S1})$$

$$g_1(\tau) = \exp(-Dq^2\tau) \quad (\text{Eq. S2})$$

where  $\tau$  is the decay time,  $\beta$  is the extrapolated value at  $\tau = 0$ , and  $D$  is the diffusion coefficient;  $q$  is the scattering vector. The vacuum wavelength  $\lambda$  of the irradiating laser beam was 633 nm, and the total scattering angle  $\theta$  was 173°. All  $D_h$  values were calculated using the Stokes–Einstein equation (Eq. S3), based on the average of three measurement cycles.

$$D_h = \frac{kT}{3\pi\eta D} \quad (\text{Eq. S3})$$

Here,  $k$  is the Boltzmann constant,  $T$  is the absolute temperature (25 °C = 298 K, 40 °C = 318 K), and  $\eta$  is the viscosity of water at 298 K or 318 K. The  $D_h$  values were calculated using software (Malvern, Zetasizer software v. 7.12) or manually using the slope of the graph in Eq. S2 when the accuracy of the automatic software calculation seemed to be poor based on the correlation function data.

### **Construction of the prediction model** [ref. S1]

The dataset in Table S1 was used for machine learning. Using ES-LiR, linear regression models were prepared for all the combinations of  $x_n$  ( $2^n - 1$  patterns), i.e.,  $\{x_1 \text{ only}\}$ ,  $\{x_1, x_2\}$ ,  $\{x_1, x_3\}$ ,  $\{x_1, x_4\}$ , ...,  $\{x_1, x_n\}$ ,  $\{x_2, x_3\}$ , ...,  $\{x_{n-1}, x_n\}$ ,  $\{x_1, x_2, x_3\}$ ,  $\{x_1, x_2, x_4\}$ , ...,  $\{x_1, x_2, \dots, x_n\}$ . Each  $x_n$  has an option whether it is used or not. The total  $2^n$  combinations of the multiple linear regression models are constructed exhaustively. As the case without the use of any  $x_n$  was removed, total  $2^n - 1$  models were constructed. The prediction accuracy of the models was verified by cross-validation error (CVE). After the constructed models were sorted in the ascending order of the CVE values, the coefficients were summarized in the weight diagram. This algorithm was implemented in Python. The descriptors were first extracted from the weight diagram visually. Then, the further selection, including the addition and removal, was carried out based on our chemical insight. After the descriptors were selected based on the weight diagram, five-fold cross-validation was carried out to validate the model (Figs. S4 and S5).

## Results and Discussion

**Table S1.** List of the experimental values of the explanatory variables ( $x_n$ ;  $n = 1-10$ ) and the objective variables ( $y$ )

| Code | $x_1$         | $x_2$       | $x_3$       | $x_4$           | $x_5$       | $x_6$        | $x_7$       | $x_8$         | $x_9$                      | $x_{10}$    | $y_1$                            | $y_2$                            | References |
|------|---------------|-------------|-------------|-----------------|-------------|--------------|-------------|---------------|----------------------------|-------------|----------------------------------|----------------------------------|------------|
|      | NIPAm<br>[mM] | BIS<br>[mM] | AAC<br>[mM] | Monomer<br>[mM] | SDS<br>[mM] | NaCl<br>[mM] | KPS<br>[mM] | Water<br>[mL] | stirring<br>speed<br>[rpm] | $T$<br>[°C] | $D_h$<br>(40 °C, pH = 3)<br>[nm] | $D_h$<br>(25 °C, pH = 3)<br>[nm] |            |
| 1    | 147.8         | 0.8         | 1.5         | 150             | 0           | 0            | 2           | 100           | 250                        | 70          | 369                              | 1380                             |            |
| 2    | 147.8         | 1.5         | 0.8         | 150             | 0           | 0            | 2           | 100           | 250                        | 70          | 332                              | 1780                             |            |
| 3    | 147.0         | 1.5         | 1.5         | 150             | 0           | 0            | 2           | 100           | 250                        | 70          | 324                              | 1163                             | [ref. S2]  |
| 4    | 141.0         | 1.5         | 7.5         | 150             | 0           | 0            | 2           | 100           | 250                        | 70          | 383                              | 1175                             | [ref. S2]  |
| 5    | 133.5         | 1.5         | 15.0        | 150             | 0           | 0            | 2           | 200           | 250                        | 70          | 567                              | 1522                             | [ref. S2]  |
| 6    | 103.5         | 1.5         | 45.0        | 150             | 0           | 0            | 2           | 200           | 250                        | 70          | 491                              | 990                              |            |
| 7    | 103.5         | 1.5         | 45.0        | 150             | 0           | 0            | 2           | 500           | 250                        | 70          | 329                              | 1312                             |            |
| 8    | 73.5          | 1.5         | 75.0        | 150             | 0           | 0            | 2           | 100           | 250                        | 70          | 338                              | 586                              | [ref. S2]  |
| 9    | 141.0         | 7.5         | 1.5         | 150             | 0           | 0            | 2           | 100           | 250                        | 70          | 415                              | 707                              |            |
| 10   | 135.0         | 7.5         | 7.5         | 150             | 0           | 0            | 2           | 100           | 250                        | 70          | 405                              | 768                              |            |
| 11   | 127.5         | 7.5         | 15.0        | 150             | 0           | 0            | 2           | 200           | 250                        | 70          | 410                              | 966                              |            |
| 12   | 97.5          | 7.5         | 45.0        | 150             | 0           | 0            | 2           | 200           | 250                        | 70          | 381                              | 621                              |            |
| 13   | 120.0         | 15.0        | 15.0        | 150             | 0           | 0            | 2           | 200           | 250                        | 70          | 435                              | 829                              |            |
| 14   | 90.0          | 15.0        | 45.0        | 150             | 0           | 0            | 2           | 200           | 250                        | 70          | 400                              | 597                              |            |
| 15   | 94.7          | 5.0         | 0.0         | 100             | 0           | 0            | 3.6         | 56            | 250                        | 60          | 320                              | 566                              |            |
| 16   | 141.0         | 1.5         | 7.5         | 150             | 1           | 0            | 2           | 200           | 250                        | 70          | 146                              | 320                              |            |
| 17   | 141.0         | 1.5         | 7.5         | 150             | 5           | 0            | 2           | 100           | 250                        | 70          | 89                               | 133                              |            |
| 18   | 133.5         | 1.5         | 15.0        | 150             | 1           | 0            | 2           | 200           | 250                        | 70          | 171                              | 511                              |            |
| 19   | 120.0         | 15.0        | 15.0        | 150             | 1           | 0            | 2           | 200           | 250                        | 70          | 204                              | 304                              |            |
| 20   | 118.5         | 1.5         | 30.0        | 150             | 5           | 0            | 2           | 100           | 250                        | 70          | 64                               | 265                              |            |
| 21   | 115.5         | 4.5         | 30.0        | 150             | 4           | 0            | 2           | 100           | 250                        | 70          | 79                               | 161                              |            |
| 22   | 105.0         | 15.0        | 30.0        | 150             | 1           | 0            | 2           | 100           | 250                        | 70          | 249                              | 358                              |            |
| 23   | 112.5         | 22.5        | 30.0        | 150             | 1           | 0            | 2           | 100           | 250                        | 70          | 221                              | 576                              |            |
| 24   | 97.5          | 7.5         | 30.0        | 150             | 1           | 0            | 2           | 100           | 250                        | 70          | 375                              | 618                              |            |
| 25   | 88.5          | 16.5        | 45.0        | 150             | 1           | 0            | 2           | 100           | 250                        | 70          | 385                              | 607                              |            |
| 26   | 87.0          | 18.0        | 45.0        | 150             | 1           | 0            | 2           | 100           | 250                        | 70          | 299                              | 489                              |            |
| 27   | 85.5          | 19.5        | 45.0        | 150             | 1           | 0            | 2           | 100           | 250                        | 70          | 361                              | 662                              |            |
| 28   | 104.3         | 0.8         | 45.0        | 150             | 1           | 0            | 2           | 100           | 250                        | 70          | 181                              | 243                              |            |
| 29   | 100.5         | 4.5         | 45.0        | 150             | 4           | 0            | 2           | 100           | 250                        | 70          | 99                               | 228                              |            |
| 30   | 82.5          | 22.5        | 45.0        | 150             | 5           | 0            | 2           | 100           | 250                        | 70          | 103                              | 149                              |            |
| 31   | 78.0          | 27.0        | 45.0        | 150             | 5           | 0            | 2           | 100           | 250                        | 70          | 151                              | 193                              |            |
| 32   | 90.0          | 15.0        | 45.0        | 150             | 5           | 0            | 2           | 100           | 250                        | 70          | 93                               | 141                              |            |
| 33   | 75.0          | 30.0        | 45.0        | 150             | 7           | 0            | 2           | 100           | 250                        | 70          | 230                              | 127                              |            |
| 34   | 94.0          | 5.0         | 1.0         | 100             | 0           | 0            | 2           | 100           | 250                        | 70          | 369                              | 739                              |            |
| 35   | 94.0          | 5.0         | 10.0        | 100             | 1           | 0            | 2           | 100           | 250                        | 70          | 157                              | 316                              |            |
| 36   | 188.0         | 10.0        | 10.0        | 200             | 0           | 0            | 2           | 100           | 250                        | 70          | 663                              | 2844                             |            |
| 37   | 282.0         | 3.0         | 15.0        | 300             | 1           | 0            | 2           | 100           | 250                        | 70          | 160                              | 334                              |            |
| 38   | 130.5         | 4.5         | 15.0        | 150             | 1           | 10           | 2           | 100           | 250                        | 70          | 269                              | 609                              |            |
| 39   | 130.5         | 4.5         | 15.0        | 150             | 1           | 30           | 2           | 100           | 250                        | 70          | 717                              | 4758                             |            |
| 40   | 144.0         | 1.5         | 4.5         | 150             | 0           | 0            | 2           | 500           | 400                        | 70          | 382                              | 1412                             |            |
| 41   | 147.0         | 1.5         | 1.5         | 150             | 0           | 0            | 0.5         | 100           | 250                        | 60          | 397                              | 2211                             |            |
| 42   | 139.5         | 3.0         | 7.5         | 150             | 0           | 0            | 1           | 100           | 250                        | 60          | 442                              | 1875                             |            |
| 43   | 138.0         | 4.5         | 7.5         | 150             | 0           | 0            | 2           | 100           | 250                        | 60          | 469                              | 2244                             |            |
| 44   | 99.0          | 1.0         | 0.0         | 100             | 0           | 0            | 2           | 100           | 250                        | 70          | 457                              | 1433                             |            |
| 45   | 294.0         | 3.0         | 3.0         | 300             | 0           | 0            | 2           | 100           | 250                        | 70          | 811                              | 3080                             |            |
| 46   | 144.0         | 4.5         | 1.5         | 150             | 0           | 0.1          | 1           | 100           | 250                        | 70          | 449                              | 1132                             |            |
| 47   | 138.0         | 4.5         | 7.5         | 150             | 0           | 1            | 2           | 100           | 250                        | 70          | 422                              | 1803                             |            |
| 48   | 130.5         | 4.5         | 15.0        | 150             | 0           | 5            | 1           | 100           | 250                        | 70          | 626                              | 5184                             |            |
| 49   | 138.0         | 4.5         | 7.5         | 150             | 0           | 10           | 2           | 100           | 250                        | 70          | 735                              | N.A.                             |            |
| 50   | 144.0         | 1.5         | 4.5         | 150             | 0           | 0            | 2           | 100           | 0                          | 70          | 453                              | 1685                             |            |
| 51   | 138.0         | 7.5         | 4.5         | 150             | 0           | 0            | 2           | 100           | 100                        | 70          | 442                              | 1744                             |            |
| 52   | 144.0         | 1.5         | 4.5         | 150             | 1           | 0            | 2           | 500           | 100                        | 70          | 132                              | 311                              |            |
| 53   | 138.0         | 7.5         | 4.5         | 150             | 0           | 0            | 2           | 100           | 400                        | 70          | 498                              | 1272                             |            |
| 54   | 147.0         | 1.5         | 1.5         | 150             | 0           | 0            | 0.5         | 100           | 250                        | 80          | 370                              | 2238                             |            |
| 55   | 145.5         | 3.0         | 1.5         | 150             | 0           | 0            | 1           | 100           | 250                        | 80          | 296                              | 633                              |            |
| 56   | 130.5         | 4.5         | 15.0        | 150             | 0           | 0            | 2           | 100           | 250                        | 80          | 373                              | 707                              |            |
| 57   | 123.0         | 12.0        | 15.0        | 150             | 0           | 0            | 4           | 100           | 250                        | 80          | 437                              | 700                              |            |
| 58   | 131.0         | 4.5         | 15.0        | 150             | 1           | 20           | 2           | 100           | 250                        | 70          | 536                              | 1134                             |            |
| 59   | 148.5         | 1.5         | 0.0         | 150             | 0.1         | 0            | 2           | 100           | 250                        | 70          | 245                              | 579                              |            |
| 60   | 148.5         | 1.5         | 0.0         | 150             | 1           | 0            | 2           | 100           | 250                        | 70          | 147                              | 257                              |            |
| 61   | 148.5         | 1.5         | 0.0         | 150             | 8           | 0            | 2           | 100           | 250                        | 70          | 56                               | 97                               |            |
| 62   | 148.5         | 1.5         | 0.0         | 150             | 16          | 0            | 2           | 100           | 250                        | 70          | 47                               | 54                               |            |
| 63   | 131.0         | 4.5         | 15.0        | 150             | 0           | 0            | 2           | 50            | 250                        | 70          | 551                              | 1604                             |            |
| 64   | 131.0         | 4.5         | 15.0        | 150             | 0           | 0            | 2           | 750           | 250                        | 70          | 415                              | 1886                             |            |
| 65   | 131.0         | 4.5         | 15.0        | 150             | 0           | 0            | 2           | 1000          | 250                        | 70          | 431                              | 2806                             |            |
| 66   | 131.0         | 4.5         | 15.0        | 150             | 0.1         | 10           | 2           | 100           | 250                        | 70          | 454                              | 2691                             |            |
| 67   | 131.0         | 4.5         | 15.0        | 150             | 0           | 0            | 2           | 500           | 600                        | 70          | 544                              | N.A.                             |            |
| 68   | 131.0         | 4.5         | 15.0        | 150             | 0           | 0            | 2           | 500           | 800                        | 70          | 412                              | 1670                             |            |
| 69   | 131.0         | 4.5         | 15.0        | 150             | 0           | 0            | 2           | 500           | 1000                       | 70          | 545                              | N.A.                             |            |
| 70   | 131.0         | 4.5         | 15.0        | 150             | 0           | 0            | 2           | 500           | 1200                       | 70          | 627                              | N.A.                             |            |

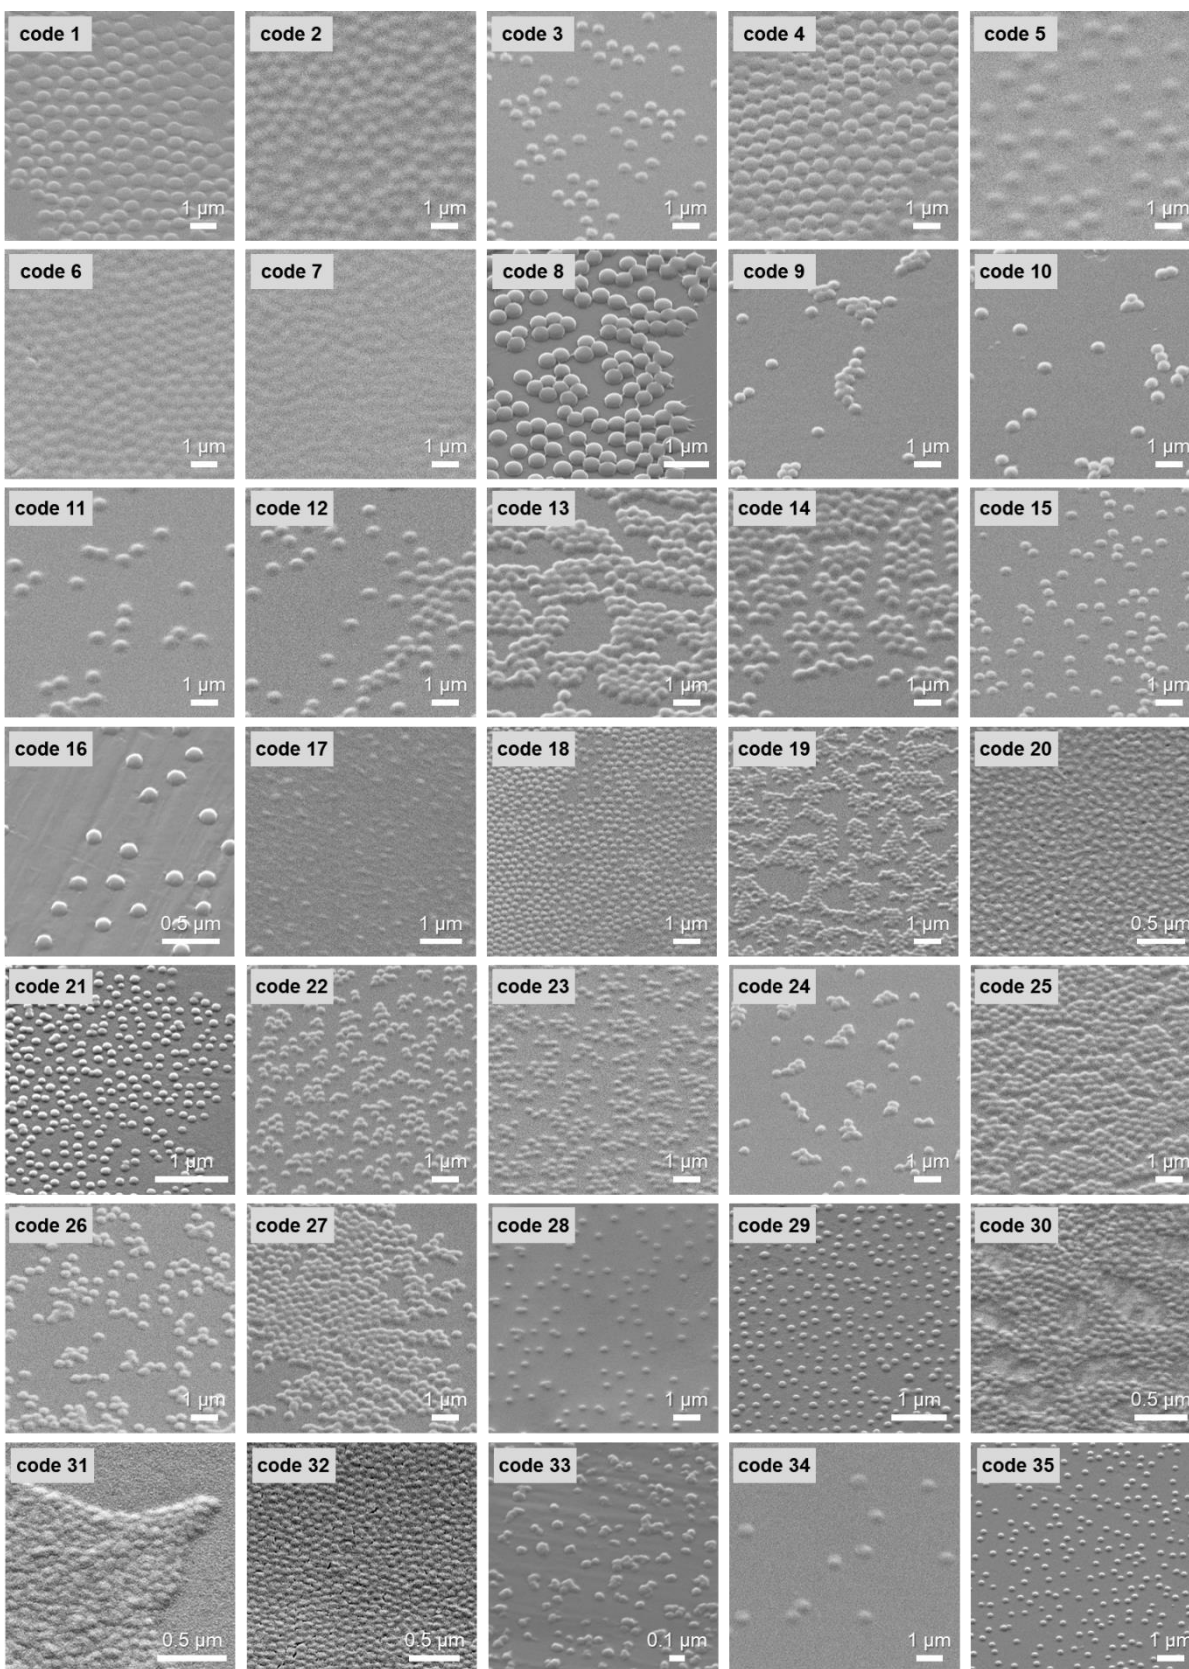

**Figure S1 (continues)** Representative SEM and FE-SEM images of the microgels.

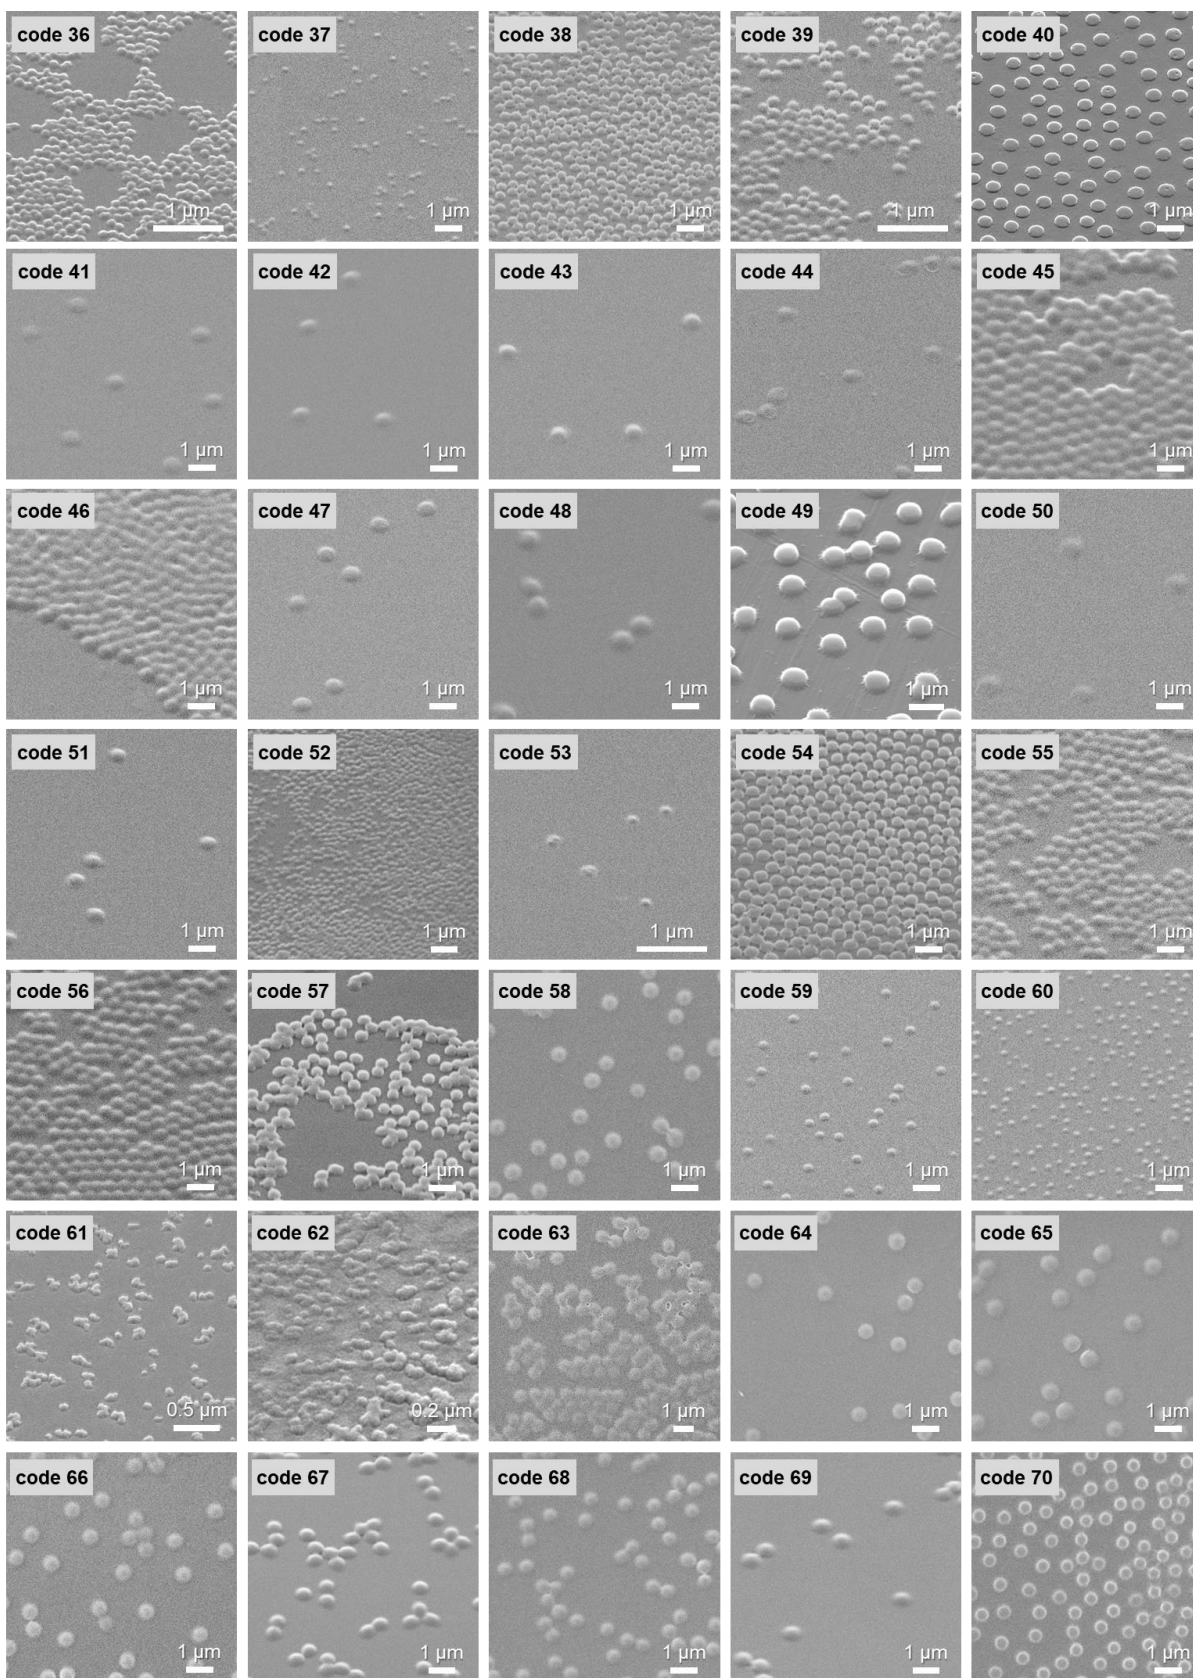

**Figure S1 (continued)** Representative SEM and FE-SEM images of the microgels.

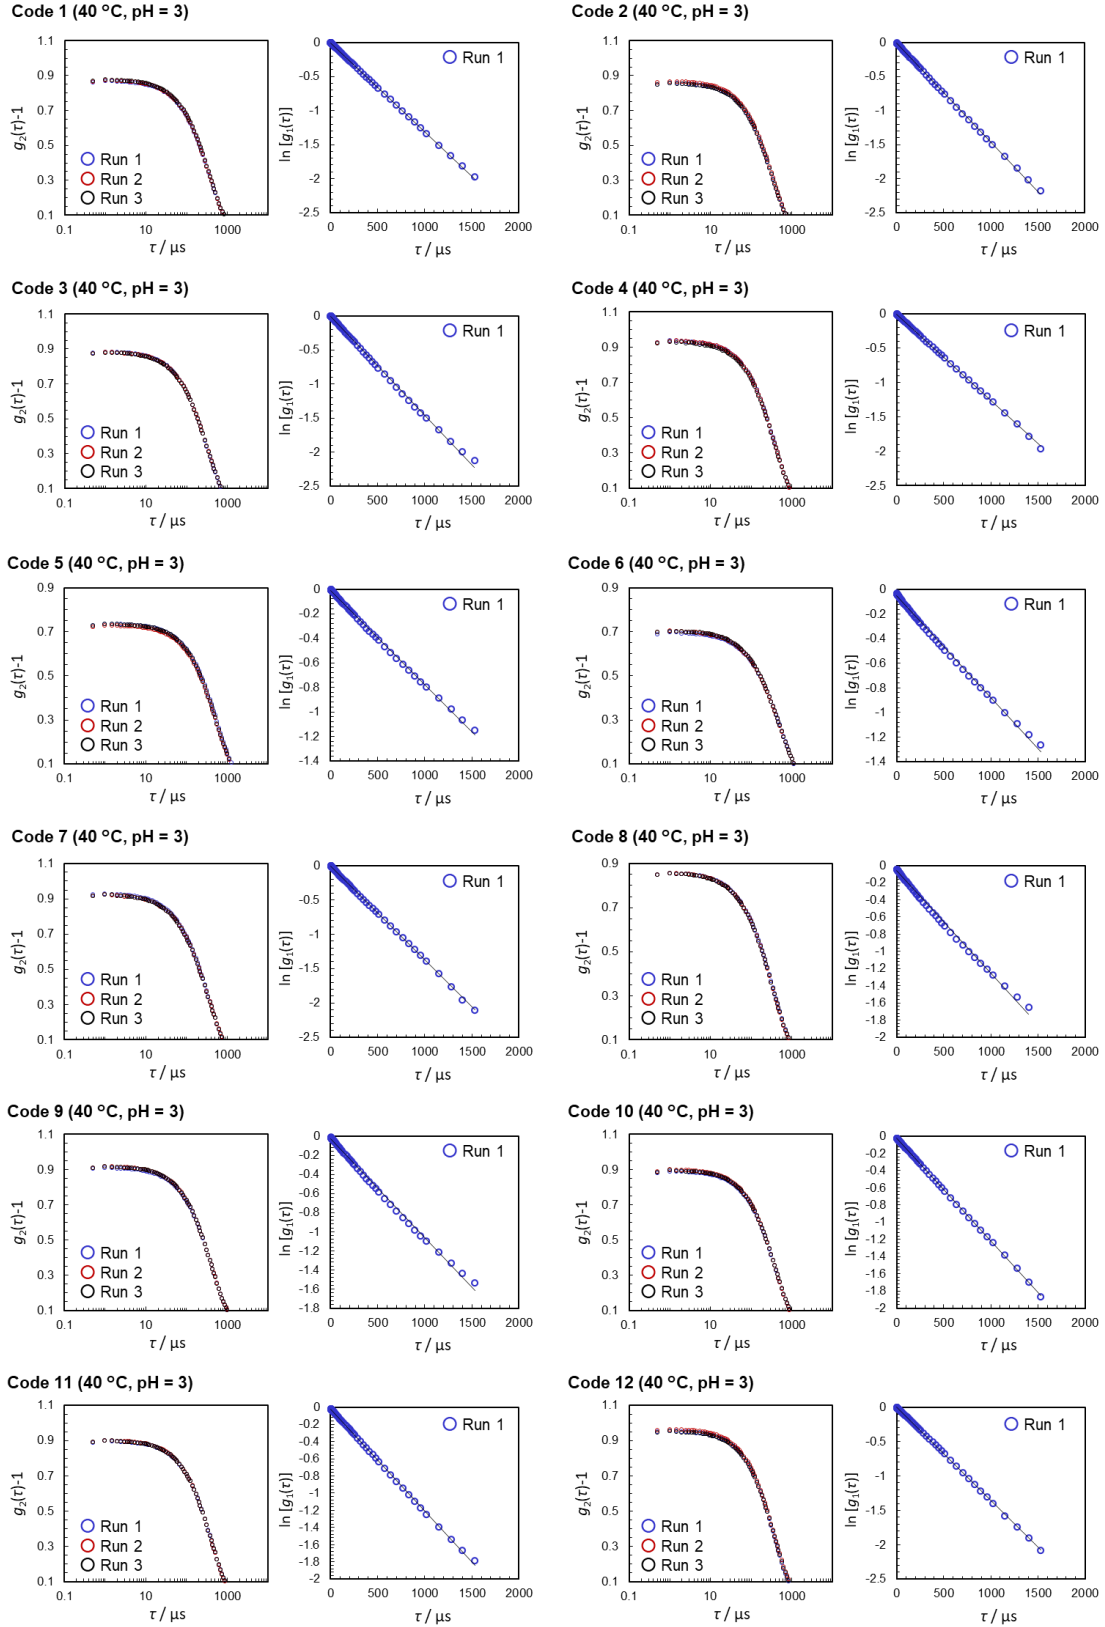

**Figure S2 (continues)** Time–correlation function of the scattering intensity,  $g_2(\tau)-1$ , and calculated time-correlation function of the scattering electric field,  $\ln[g_1(\tau)]$ , of each microgel ( $y_1$ ).



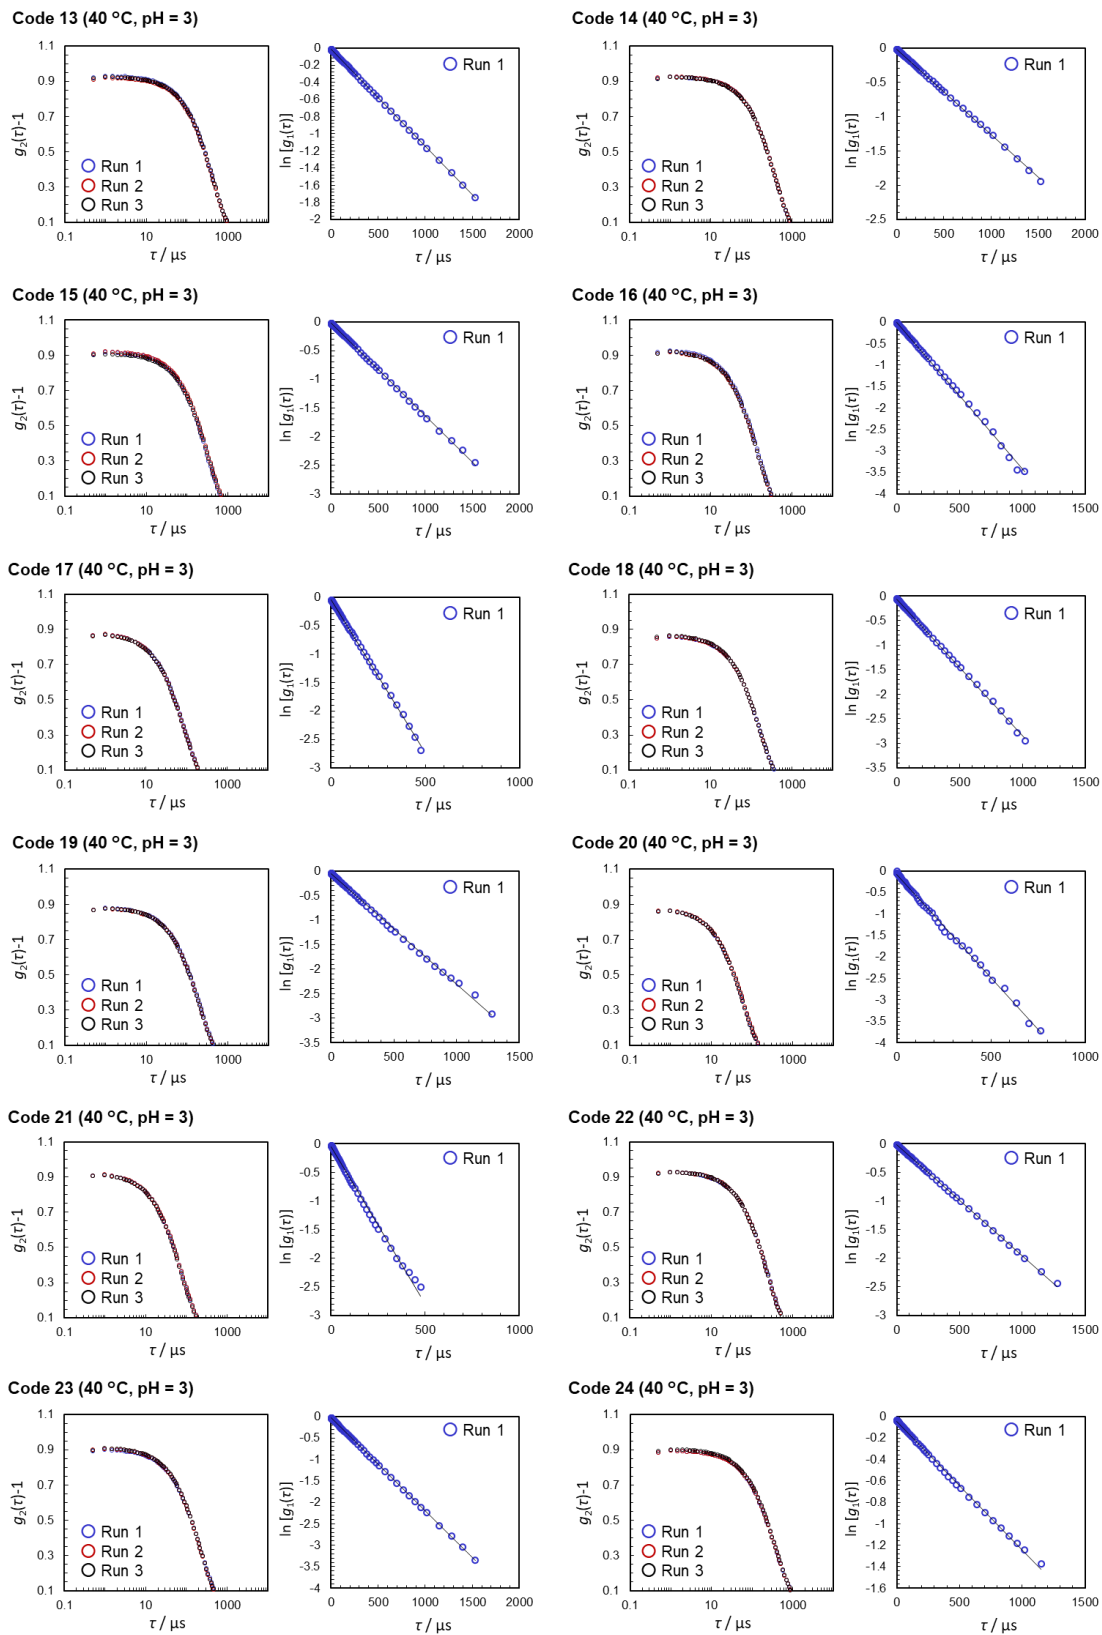

**Figure S2 (continues)** Time–correlation function of the scattering intensity,  $g_2(\tau)-1$ , and calculated time-correlation function of the scattering electric field,  $\ln[g_1(\tau)]$ , of each microgel ( $y_1$ ).

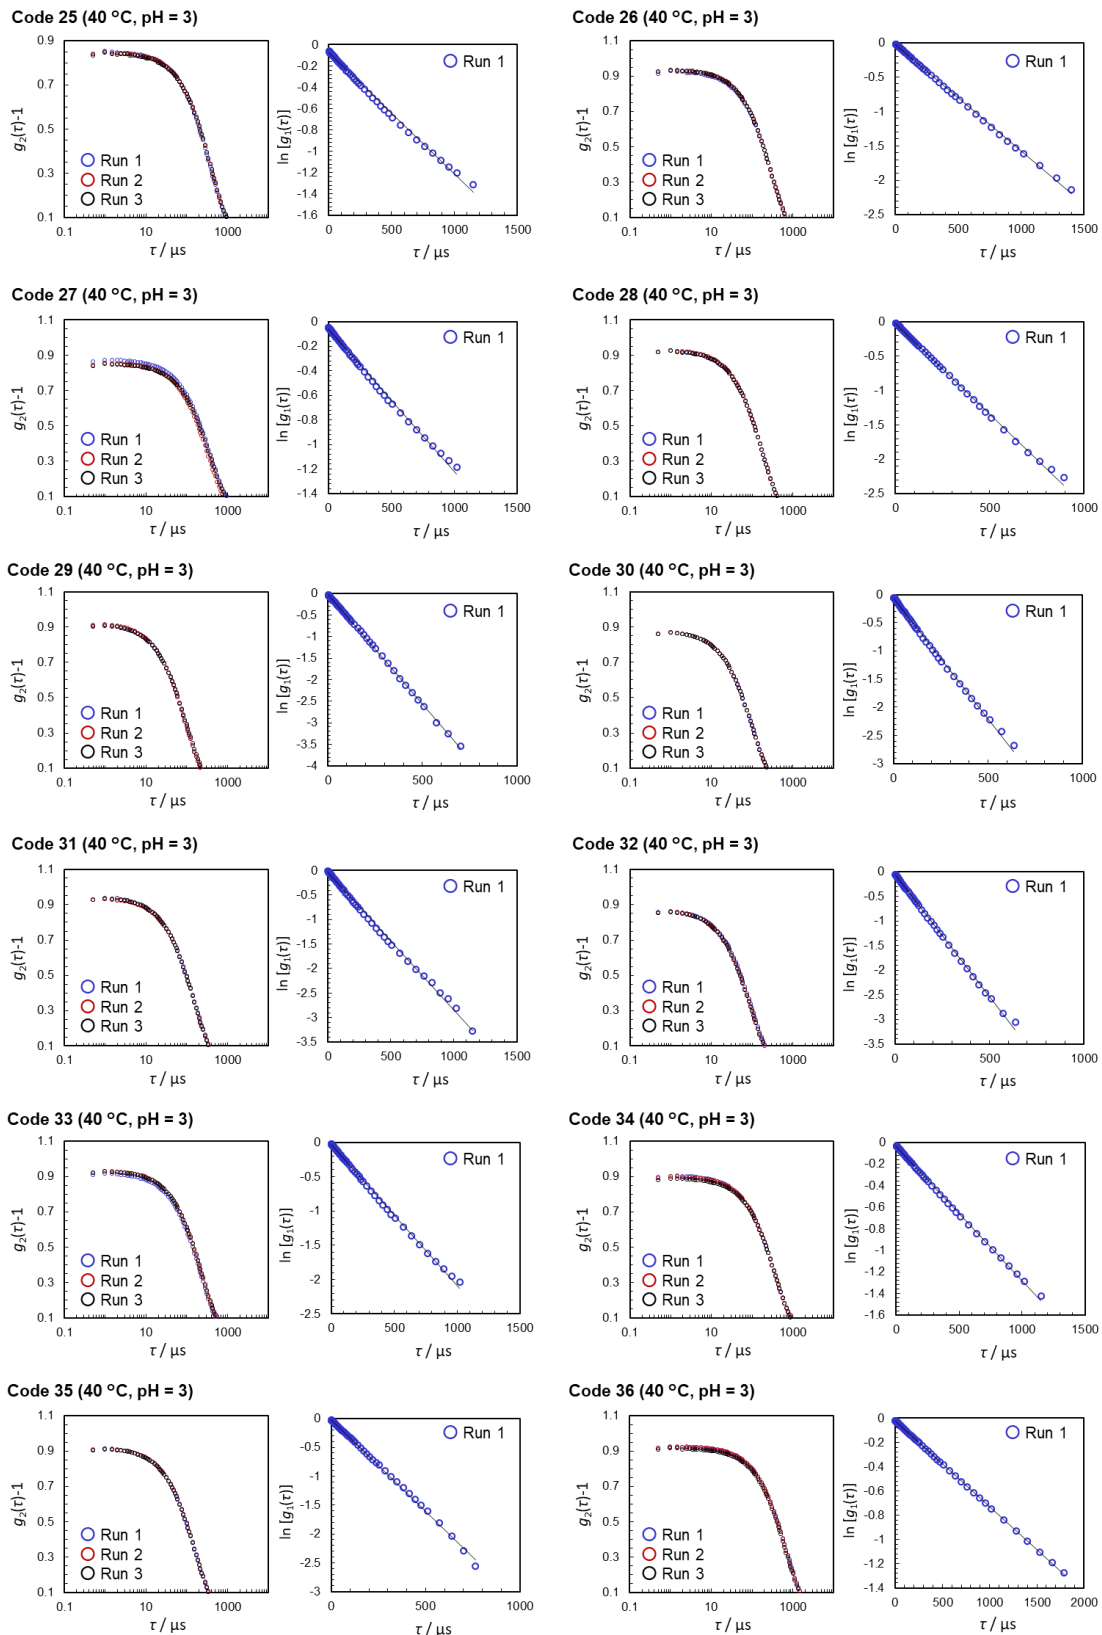

**Figure S2 (continues)** Time–correlation function of the scattering intensity,  $g_2(\tau)-1$ , and calculated time-correlation function of the scattering electric field,  $\ln[g_1(\tau)]$ , of each microgel ( $y_1$ ).

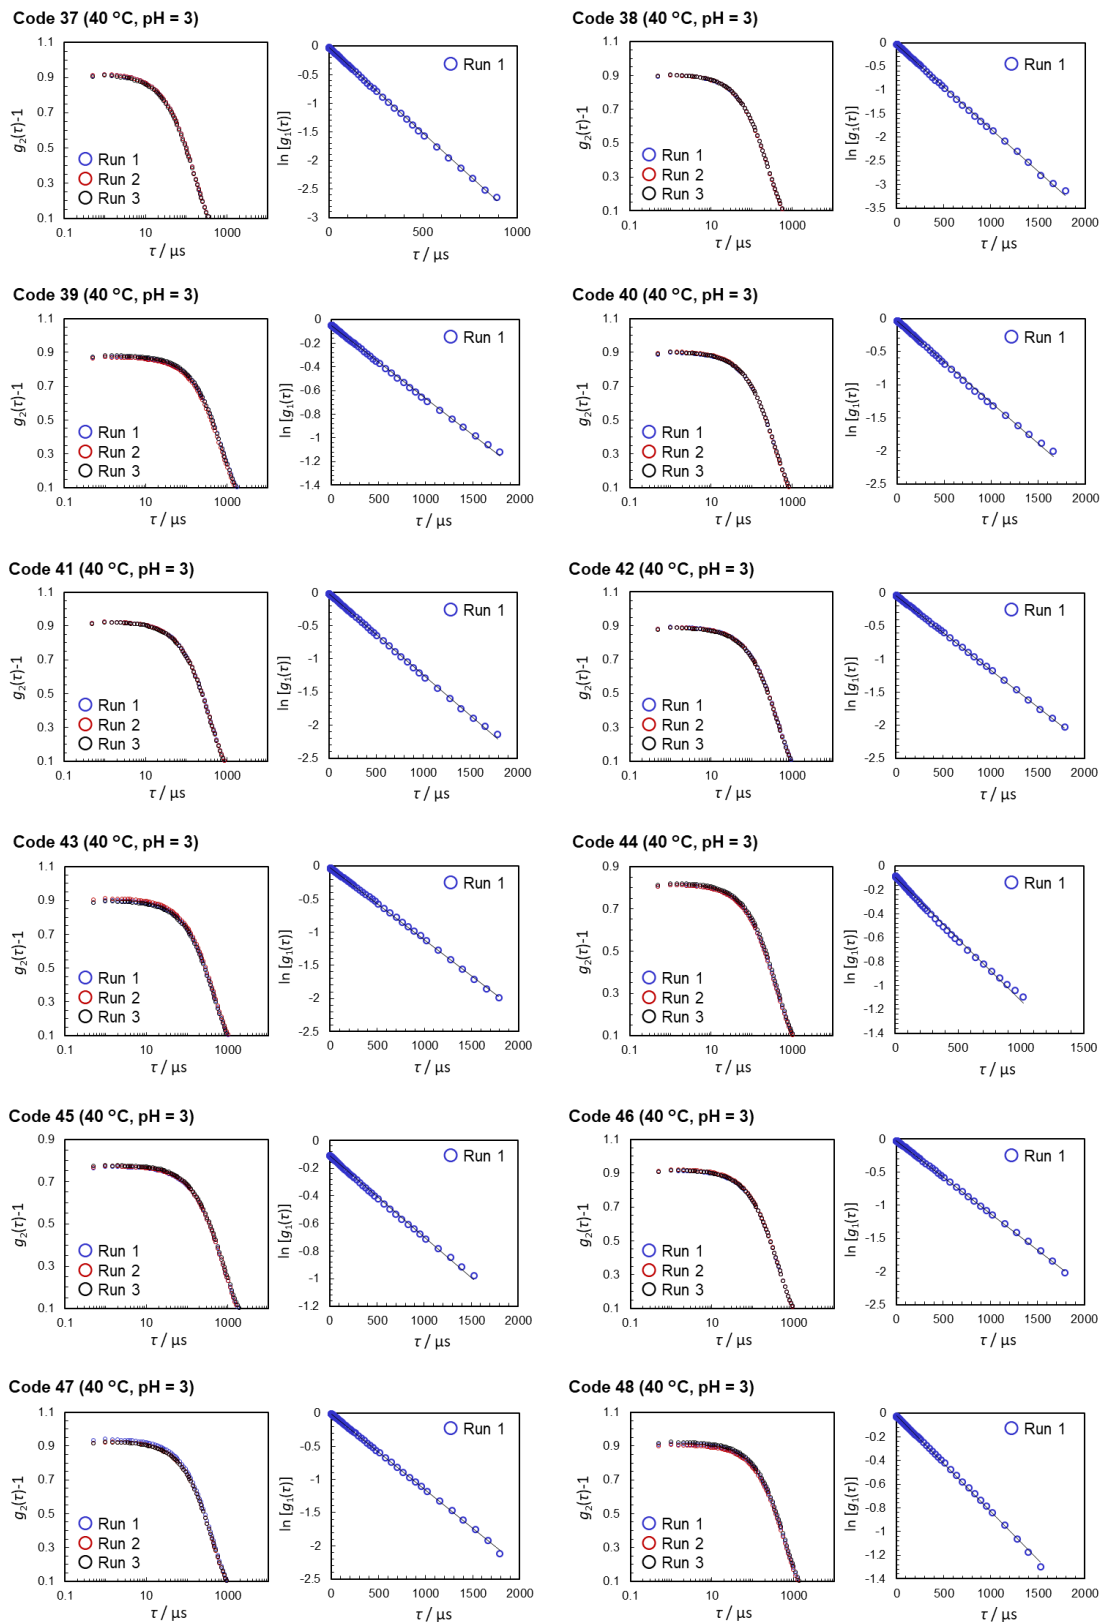

**Figure S2 (continues)** Time–correlation function of the scattering intensity,  $g_2(\tau)-1$ , and calculated time–correlation function of the scattering electric field,  $\ln[g_1(\tau)]$ , of each microgel ( $y_1$ ).

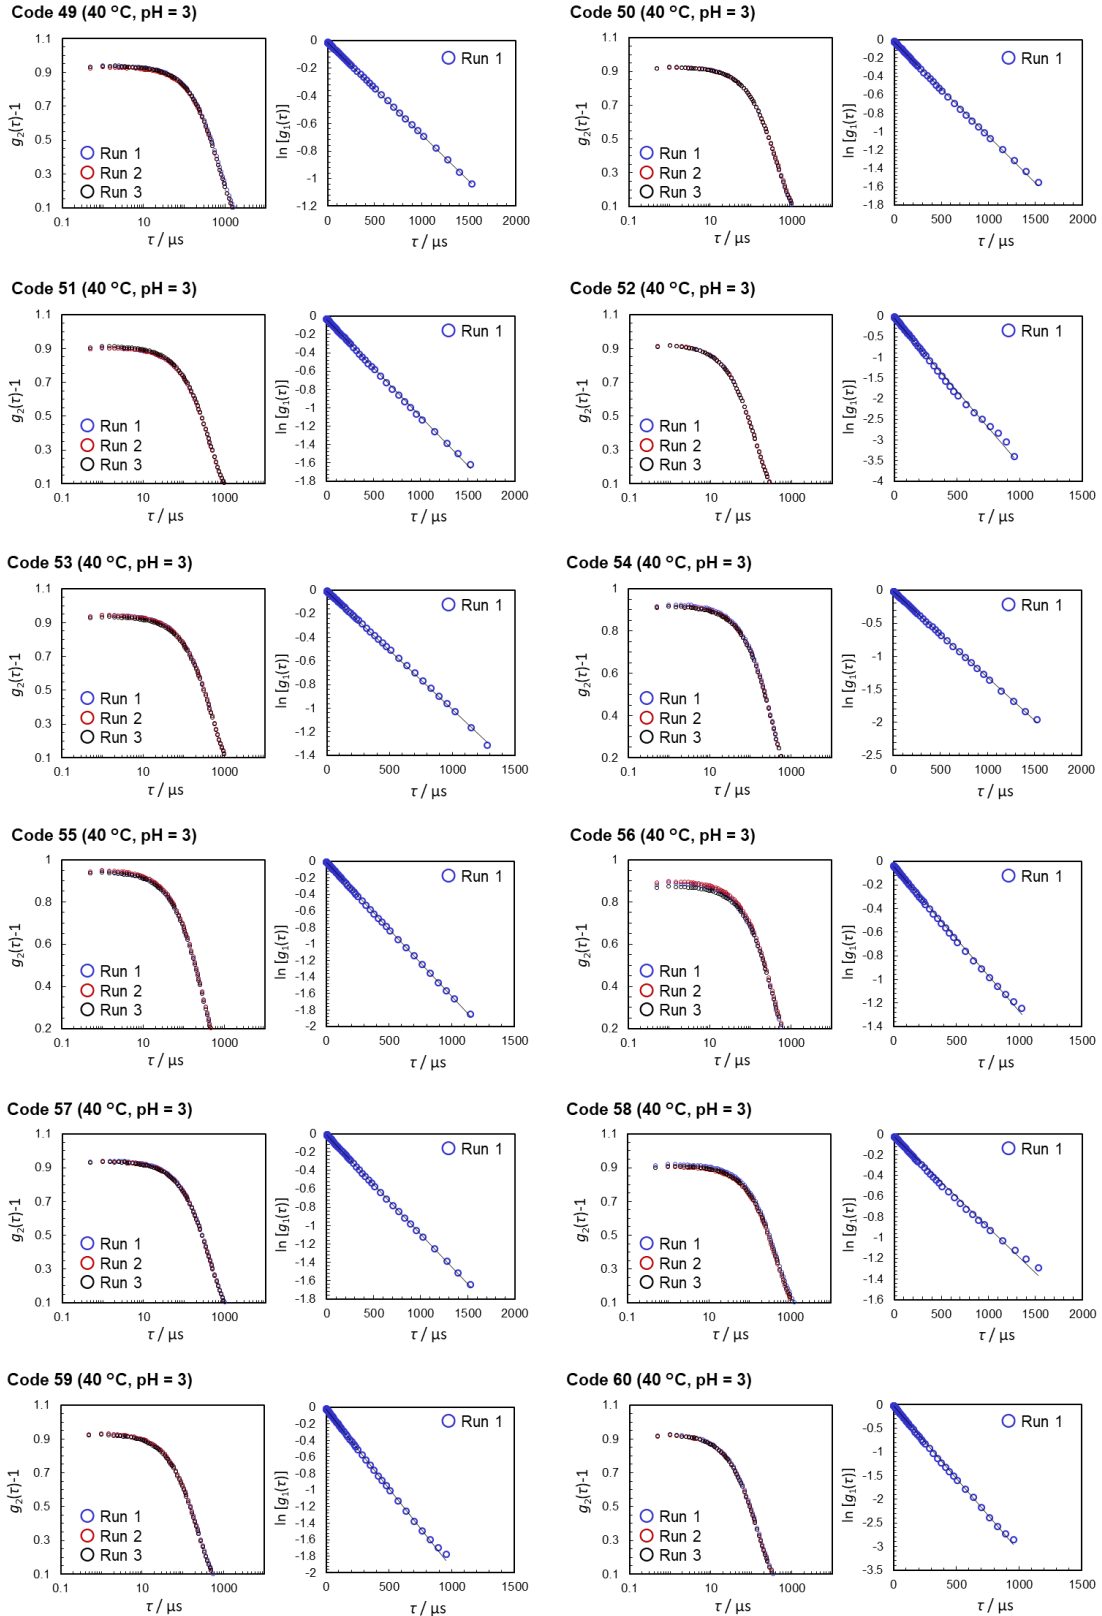

**Figure S2 (continues)** Time–correlation function of the scattering intensity,  $g_2(\tau)-1$ , and calculated time–correlation function of the scattering electric field,  $\ln[g_1(\tau)]$ , of each microgel ( $y_1$ ).

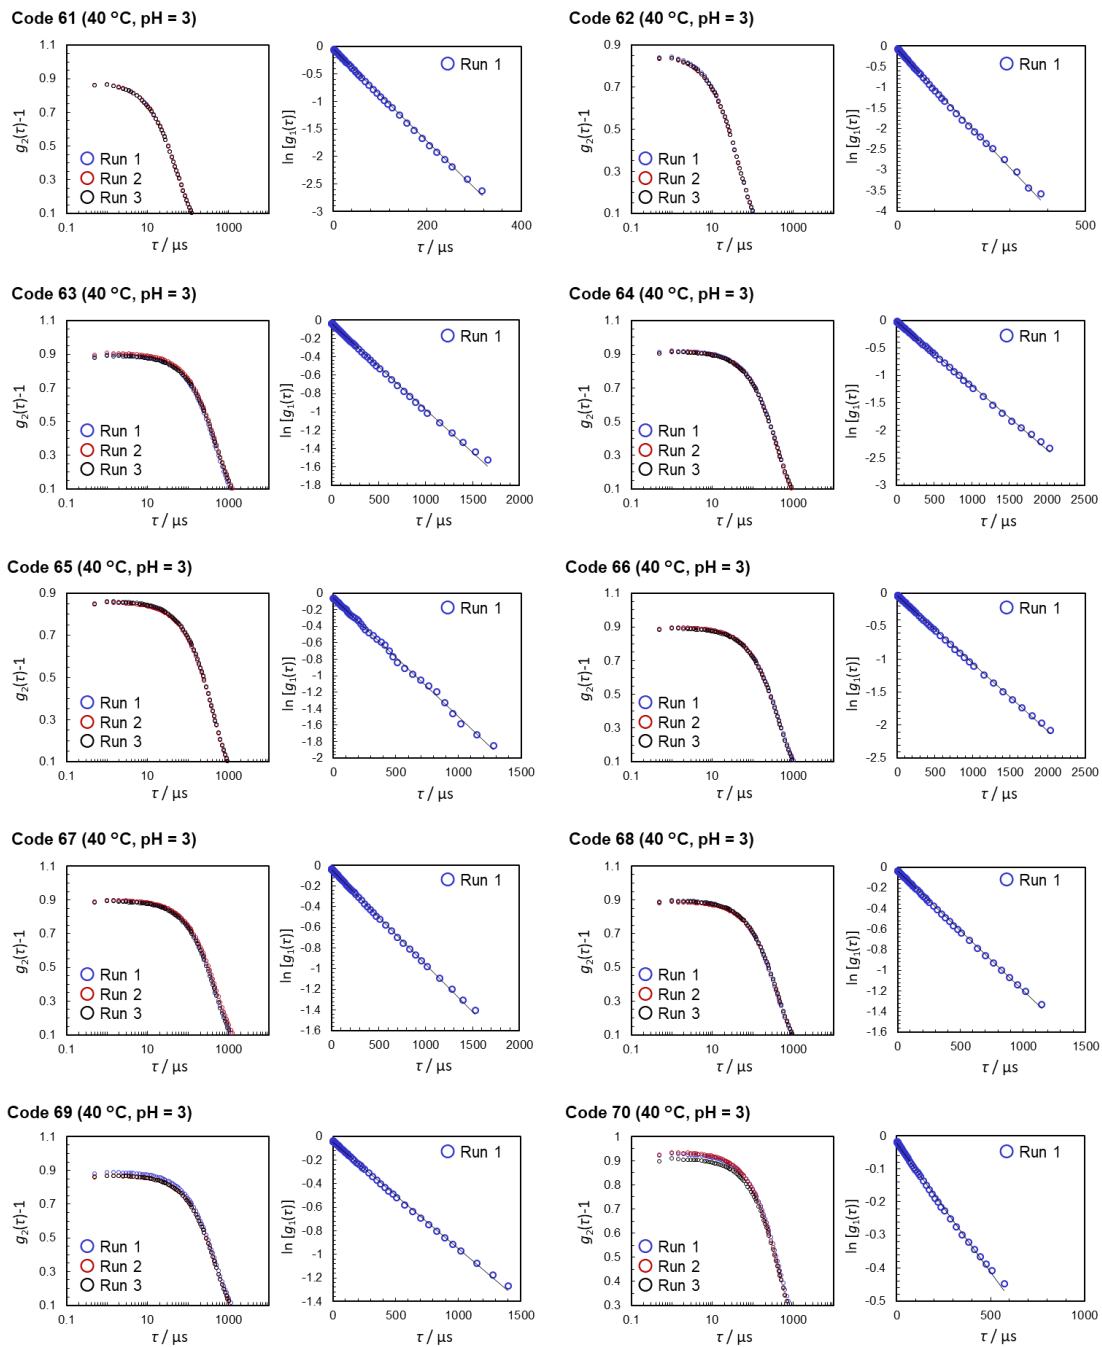

**Figure S2 (continued)** Time–correlation function of the scattering intensity,  $g_2(\tau)-1$ , and calculated time-correlation function of the scattering electric field,  $\ln[g_2(\tau)]$ , of each microgel ( $y_1$ ).

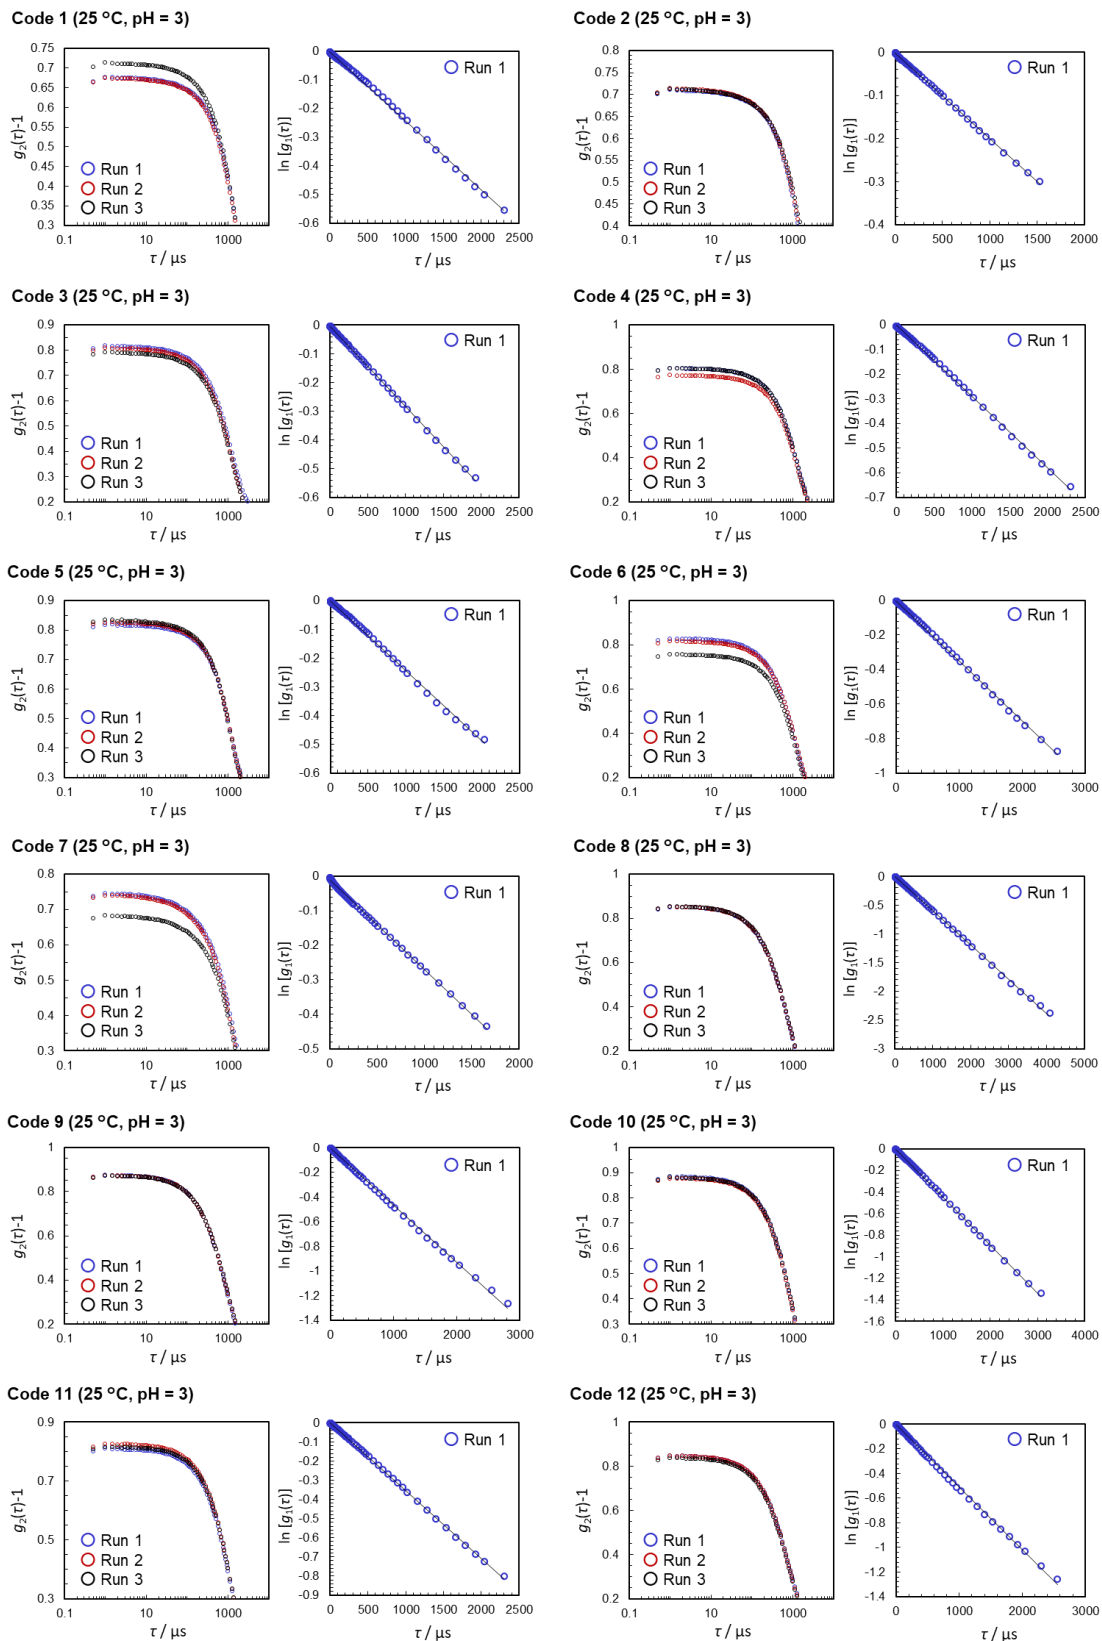

**Figure S3 (continues)** Time-correlation function of the scattering intensity,  $g_2(\tau)-1$ , and calculated time-correlation function of the scattering electric field,  $\ln[g_1(\tau)]$ , of each microgel ( $y_2$ ).

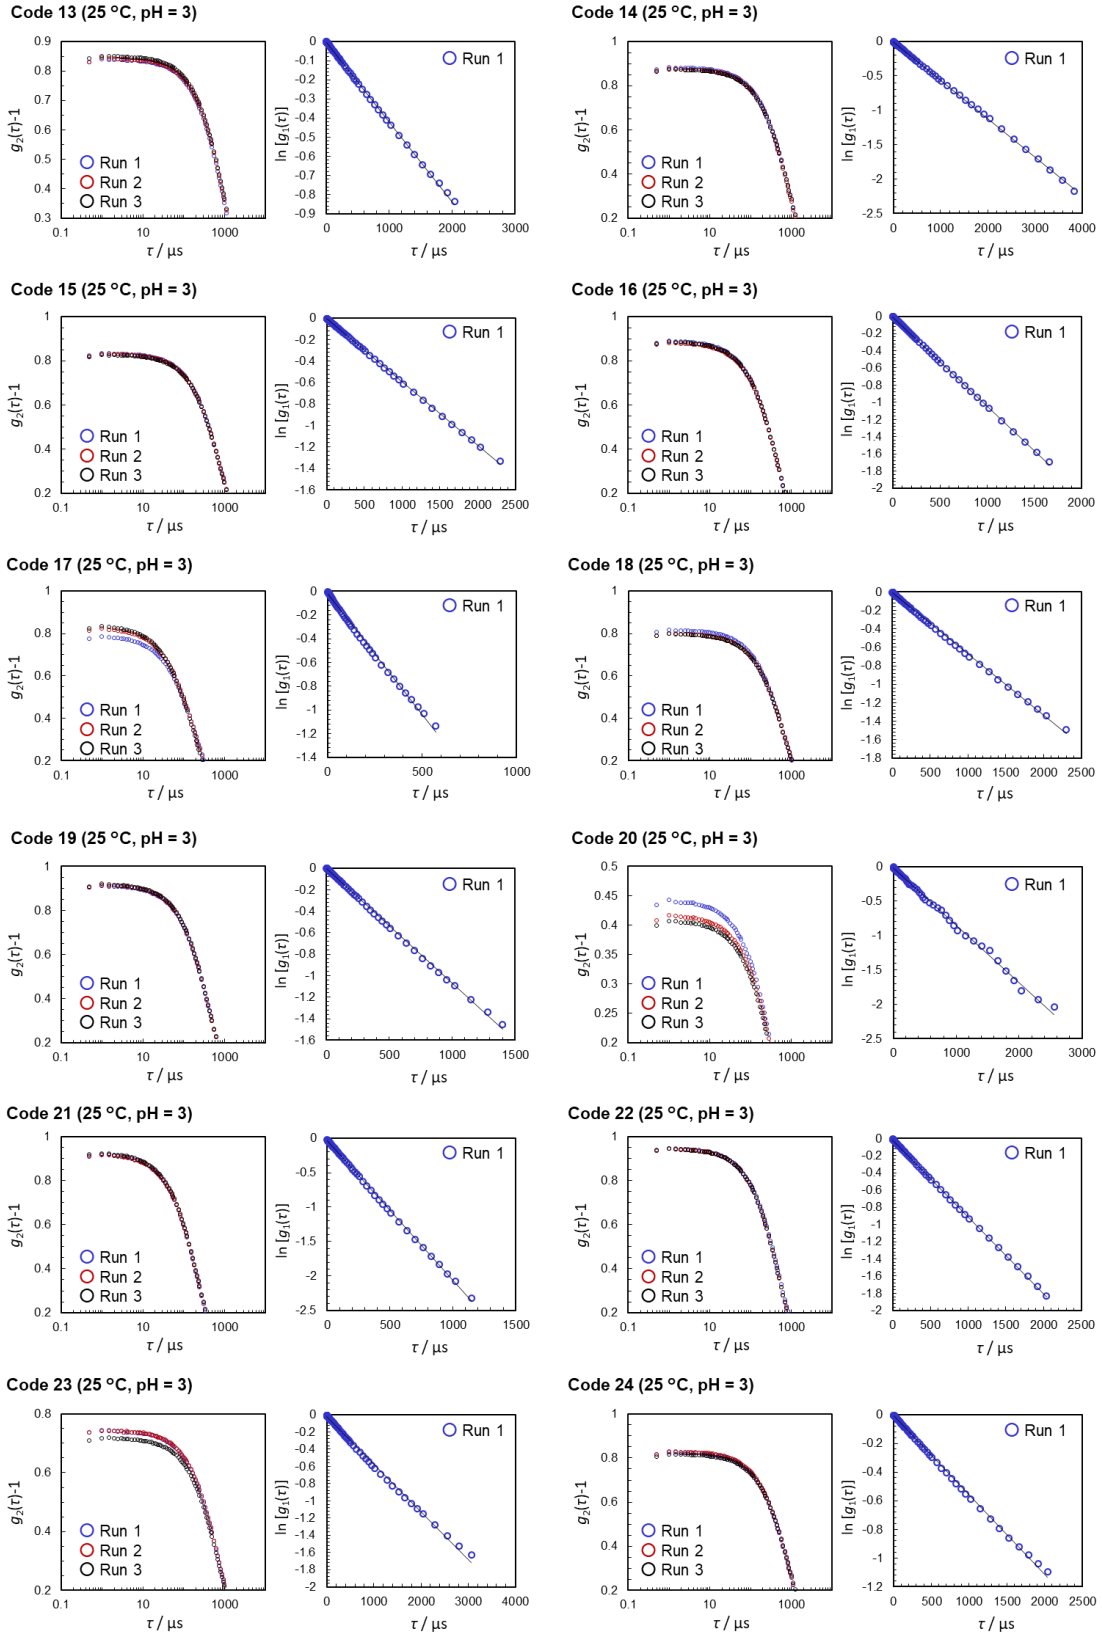

**Figure S3 (continues)** Time–correlation function of the scattering intensity,  $g_2(\tau)-1$ , and calculated time-correlation function of the scattering electric field,  $\ln[g_1(\tau)]$ , of each microgel ( $y_2$ ).

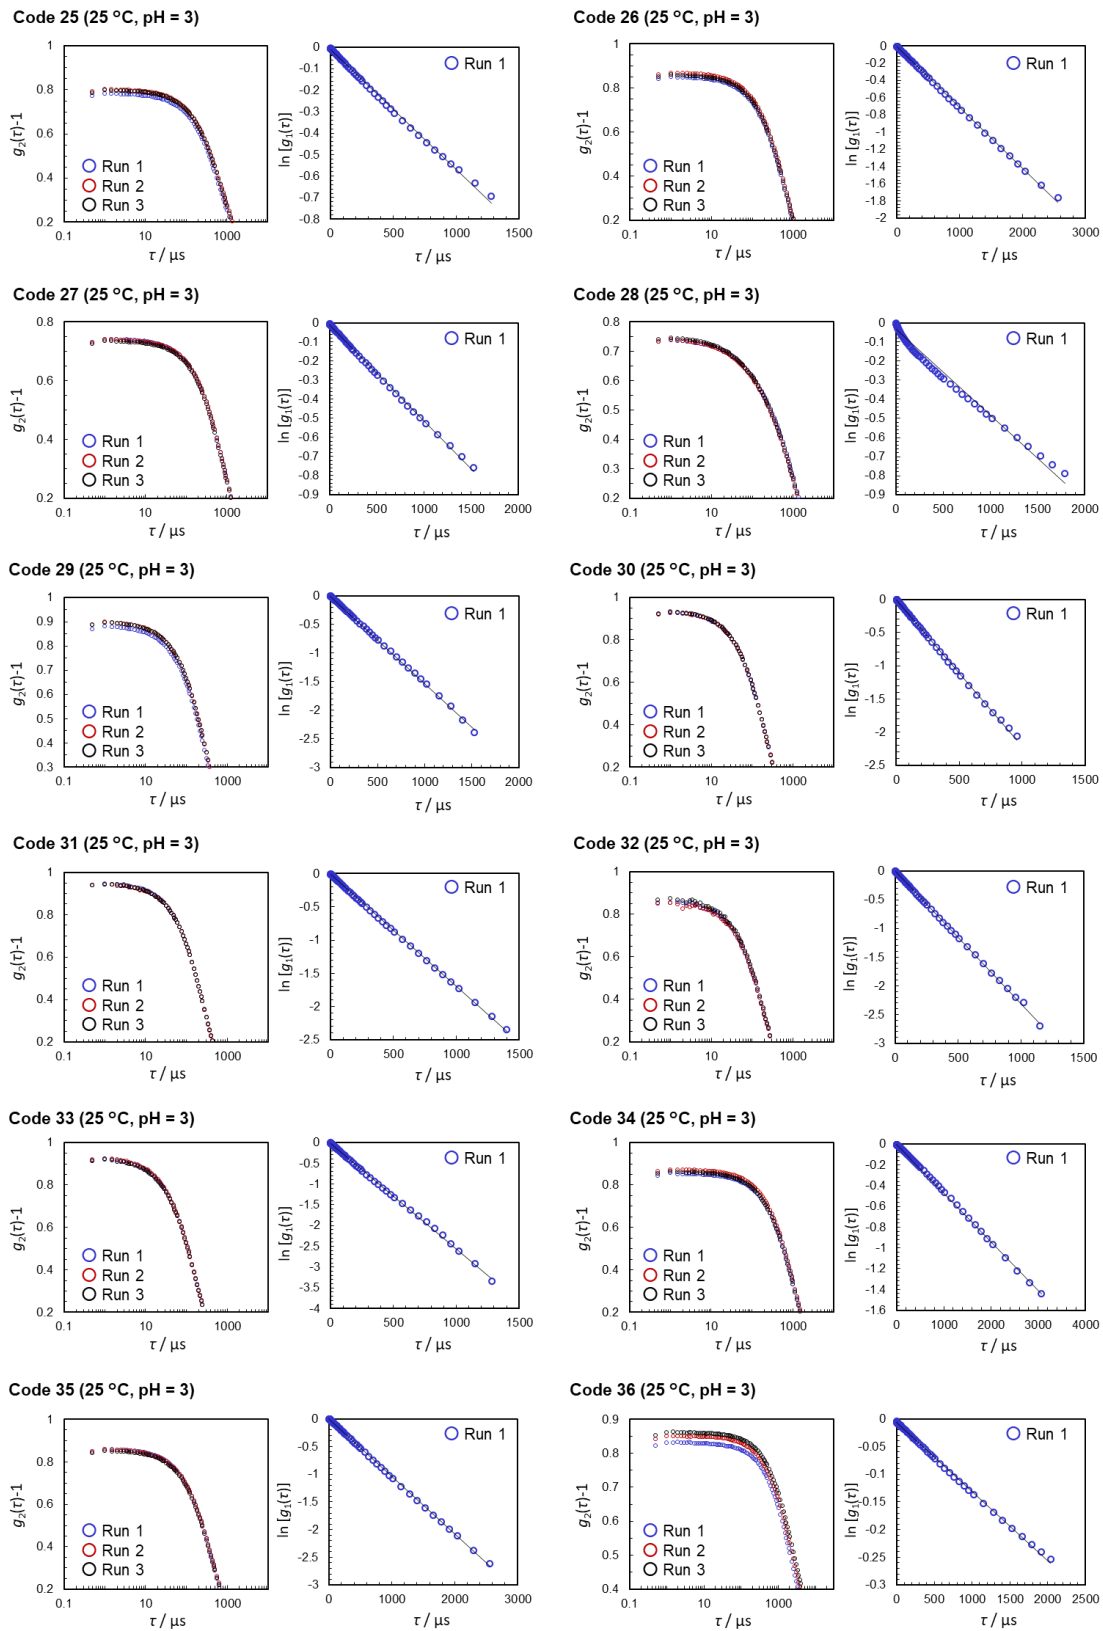

**Figure S3 (continues)** Time–correlation function of the scattering intensity,  $g_2(\tau)-1$ , and calculated time–correlation function of the scattering electric field,  $\ln[g_1(\tau)]$ , of each microgel ( $y_2$ ).



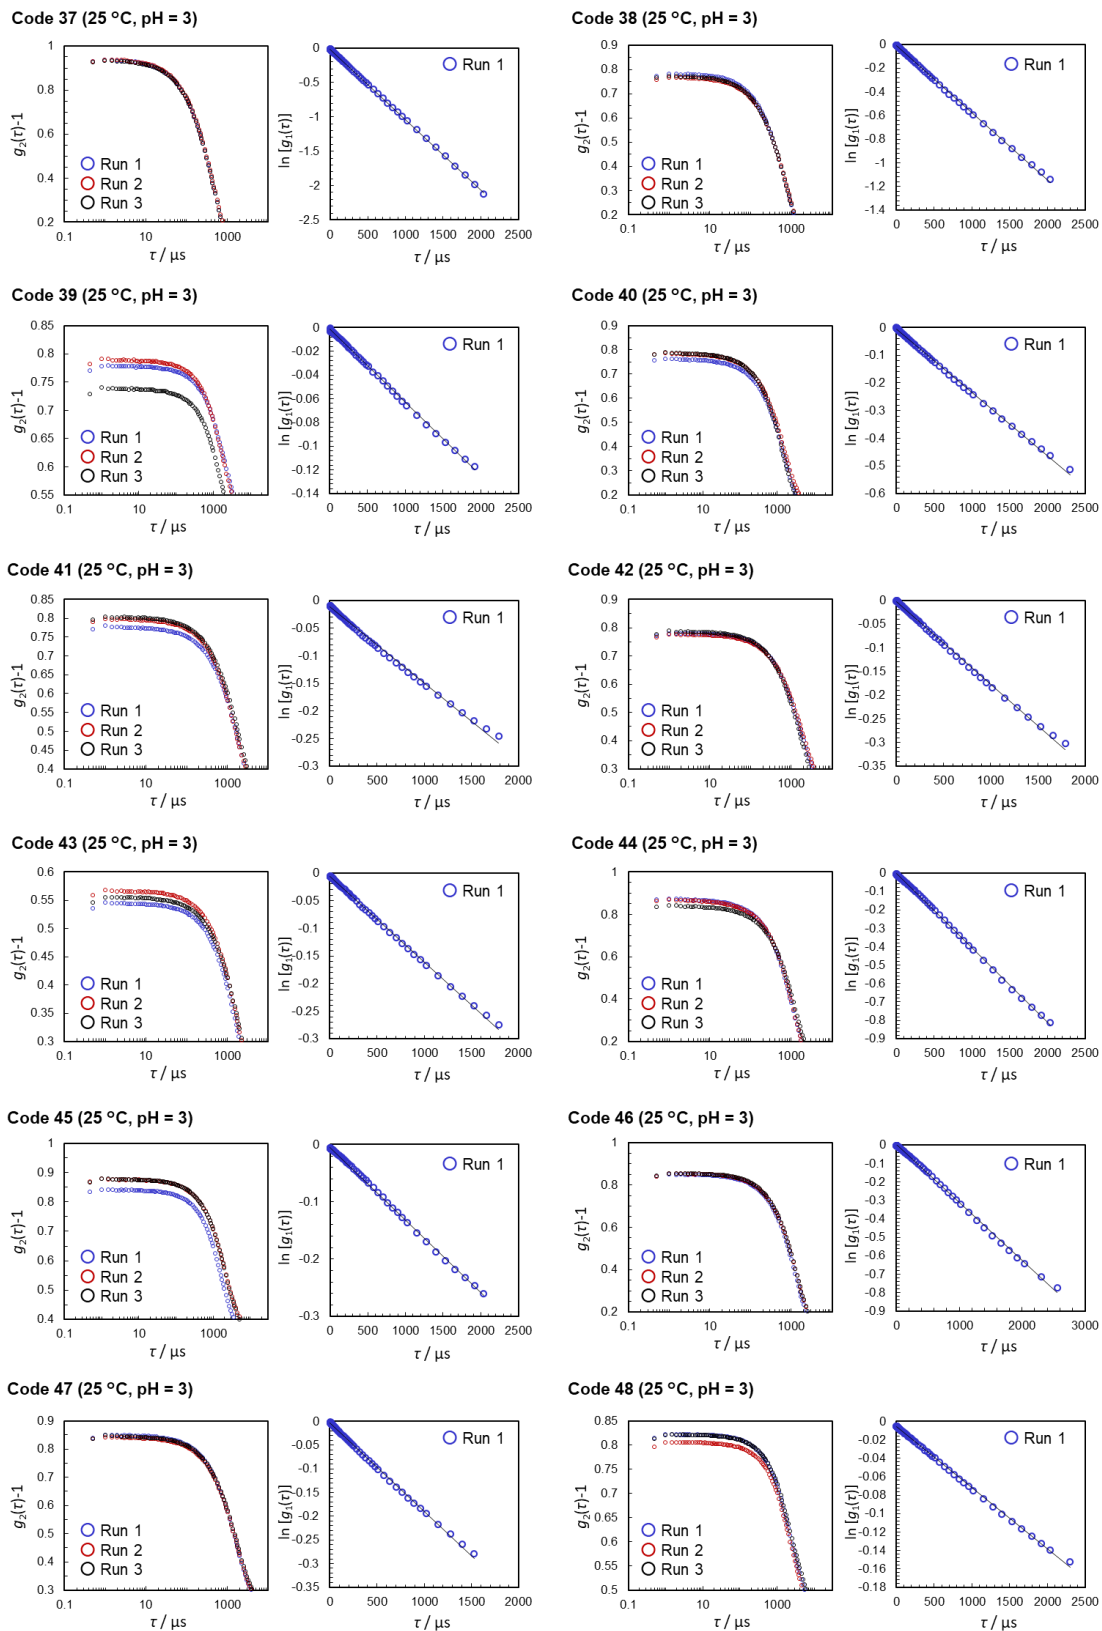

**Figure S3 (continued)** Time–correlation function of the scattering intensity,  $g_2(\tau)-1$ , and calculated time-correlation function of the scattering electric field,  $\ln[g_1(\tau)]$ , of each microgel ( $y_2$ ).

Code 49 (25 °C, pH = 3): N.A.

Code 50 (25 °C, pH = 3)

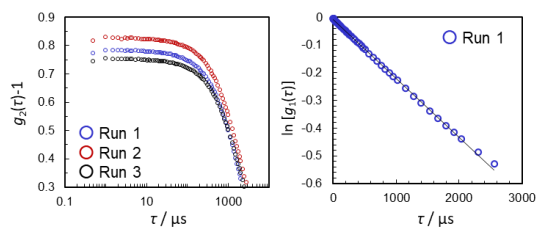

Code 51 (25 °C, pH = 3)

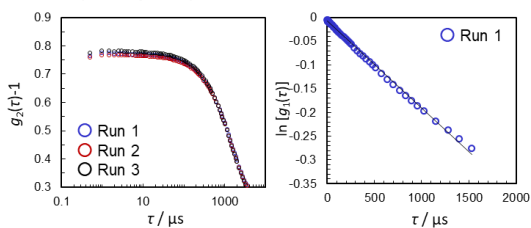

Code 52 (25 °C, pH = 3)

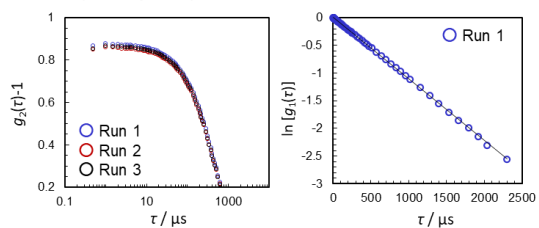

Code 53 (25 °C, pH = 3)

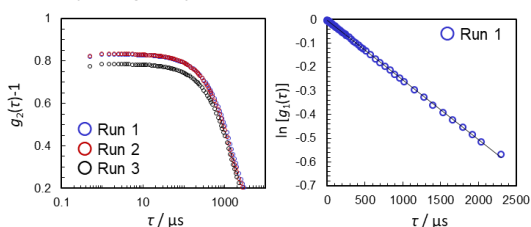

Code 54 (25 °C, pH = 3)

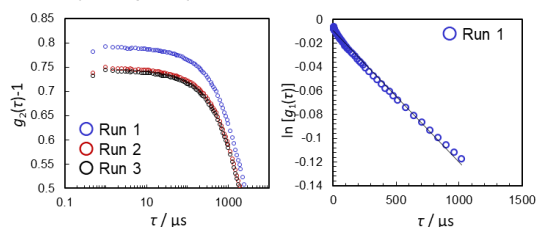

Code 55 (25 °C, pH = 3)

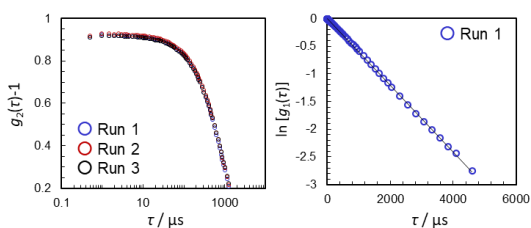

Code 56 (25 °C, pH = 3)

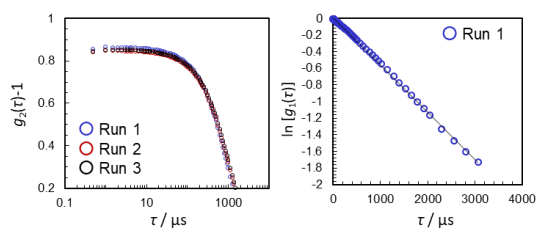

Code 57 (25 °C, pH = 3)

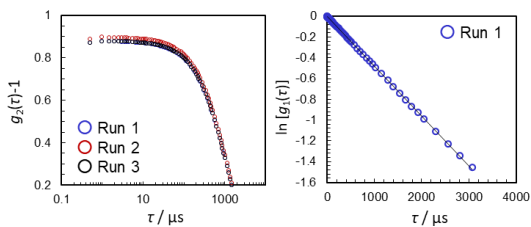

Code 58 (25 °C, pH = 3)

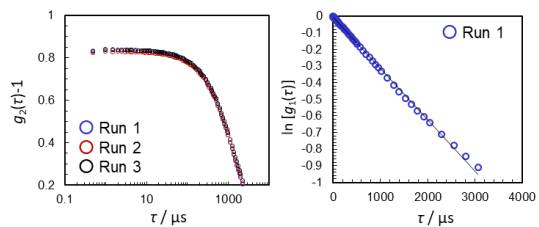

Code 59 (25 °C, pH = 3)

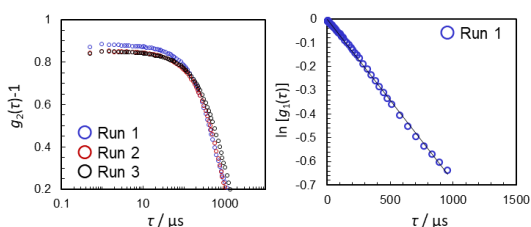

Code 60 (25 °C, pH = 3)

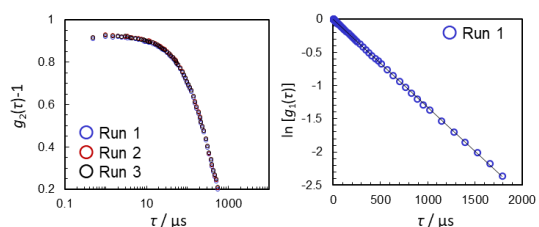

**Figure S3 (continued)** Time–correlation function of the scattering intensity,  $g_2(\tau)-1$ , and calculated time-correlation function of the scattering electric field,  $\ln[g_1(\tau)]$ , of each microgel ( $y_2$ ).

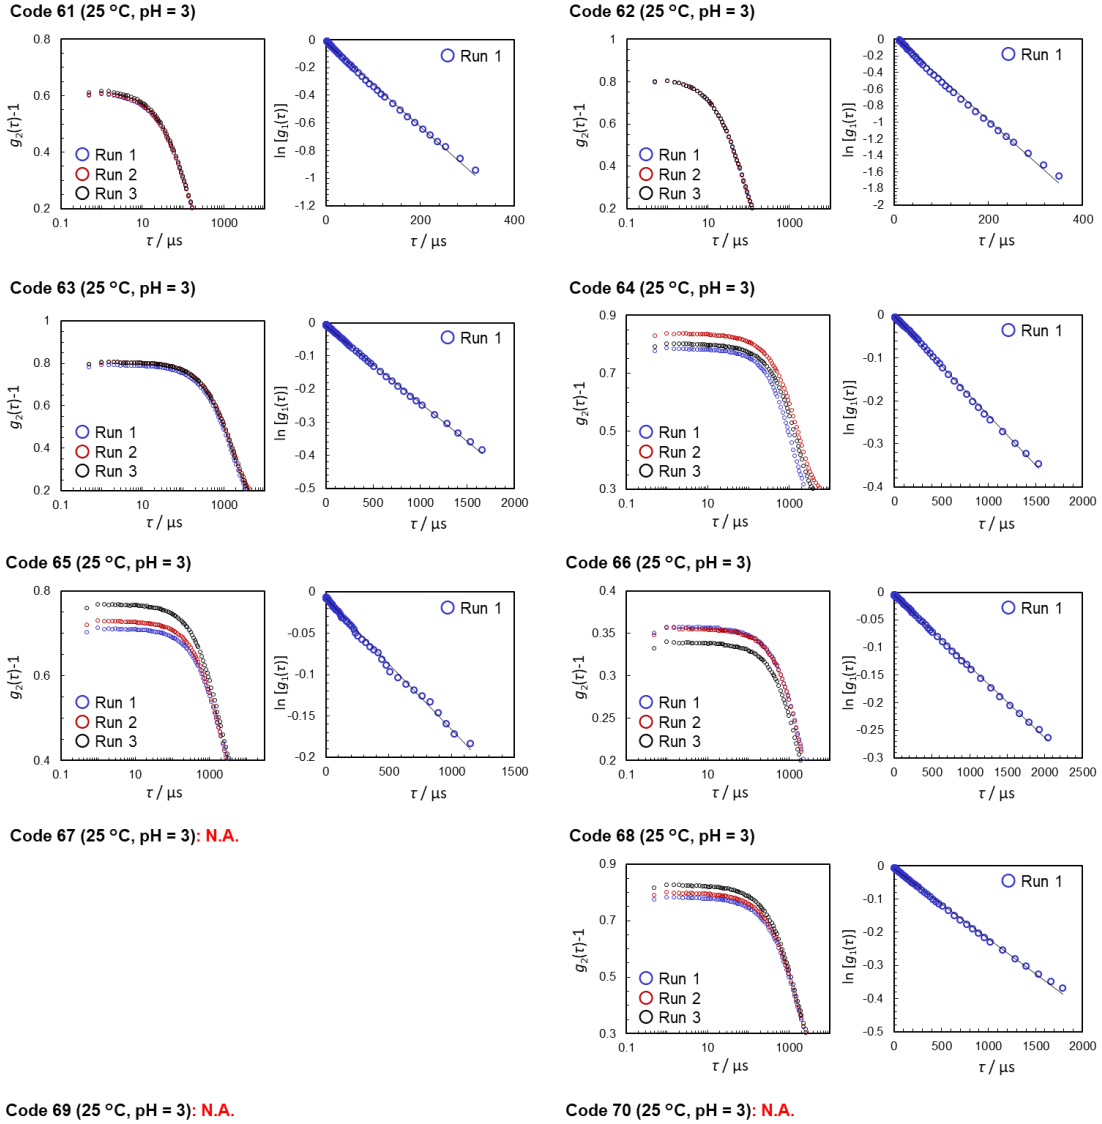

**Figure S3 (continues)** Time–correlation function of the scattering intensity,  $g_2(\tau)-1$ , and calculated time-correlation function of the scattering electric field,  $\ln[g_1(\tau)]$ , of each microgel ( $y_2$ ).

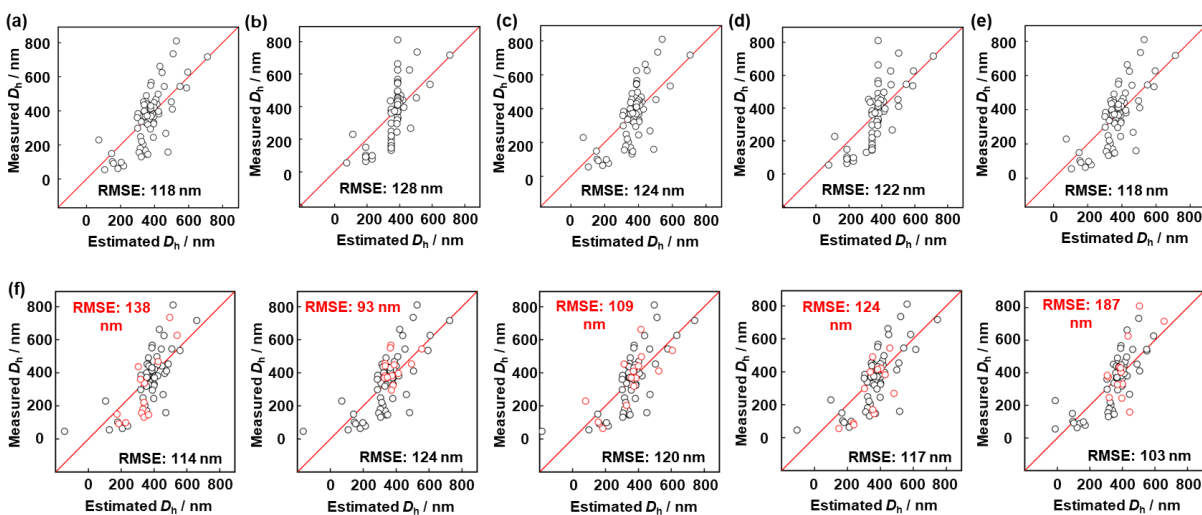

**Figure S4.** Model construction processes for  $y_1$ . (a–e) Relationship between the estimated and measured  $D_h$  for the constructed models with the different descriptors: (a)  $x_1, x_3, x_5, x_6, x_7, x_9$ , and  $x_{10}$ . (b)  $x_5, x_6, x_7$ , and  $x_{10}$ . (c)  $x_1, x_5, x_6, x_7$ , and  $x_{10}$ . (d)  $x_5, x_6, x_7, x_9$ , and  $x_{10}$ . (e)  $x_1, x_5, x_6, x_7, x_9$ , and  $x_{10}$ . (f) Relationship between the estimated and measured  $D_h$  in five-fold cross-validation of  $y_1$  predictor ( $x_1, x_5, x_6, x_7, x_9$ , and  $x_{10}$ ) using the five different training (black) and test (red) datasets.

As mentioned in the main text, the descriptors were selected three steps combining the weight diagram of ES-LiR and our chemical insight. The descriptors were finally determined based on the following factors: the relationship between the measured and estimated  $D_h$ , RMSE values, and interpretability of the selected  $x_n$  in the chemical insight.

The descriptors were extracted from the weight diagram in the first step. For  $y_1$ , the descriptors  $x_1, x_3, x_5, x_6, x_7, x_9$ , and  $x_{10}$  were extracted based on the color intensity and density from the weight diagram (Fig. 3a and Fig. S4a). Then, the descriptors  $x_5, x_6, x_7$ , and  $x_{10}$  were selected based on our chemical insight considering the mechanism of precipitation polymerization (Fig. S4b). However, the prediction accuracy lowered with decreasing the number of the descriptors. The descriptors  $x_1$  and/or  $x_9$  were added to  $x_5, x_6, x_7$ , and  $x_{10}$  (Fig. S4c–e) for improving the prediction accuracy. In this manner, we finally determined the descriptors  $x_1, x_5, x_6, x_7, x_9$ , and  $x_{10}$  for  $y_1$  (Fig. 3c).

The training dataset was randomly divided into five groups. Four groups were assigned to the training data, and the remaining group was used as the test data for validation. After construction of the model, the root-mean-squared error (RMSE) was calculated for both the training and test data. This validation was carried out in five patterns, changing the assignment of the test data. The average RMSE values were  $116 \pm 7.0$  nm for the training data and  $130 \pm 32$  nm for the test data (Fig. S4f). The positive and negative correlations of the descriptors did not change depending on the model. Therefore, the extracted descriptor is suitable for predicting  $y_1$ .

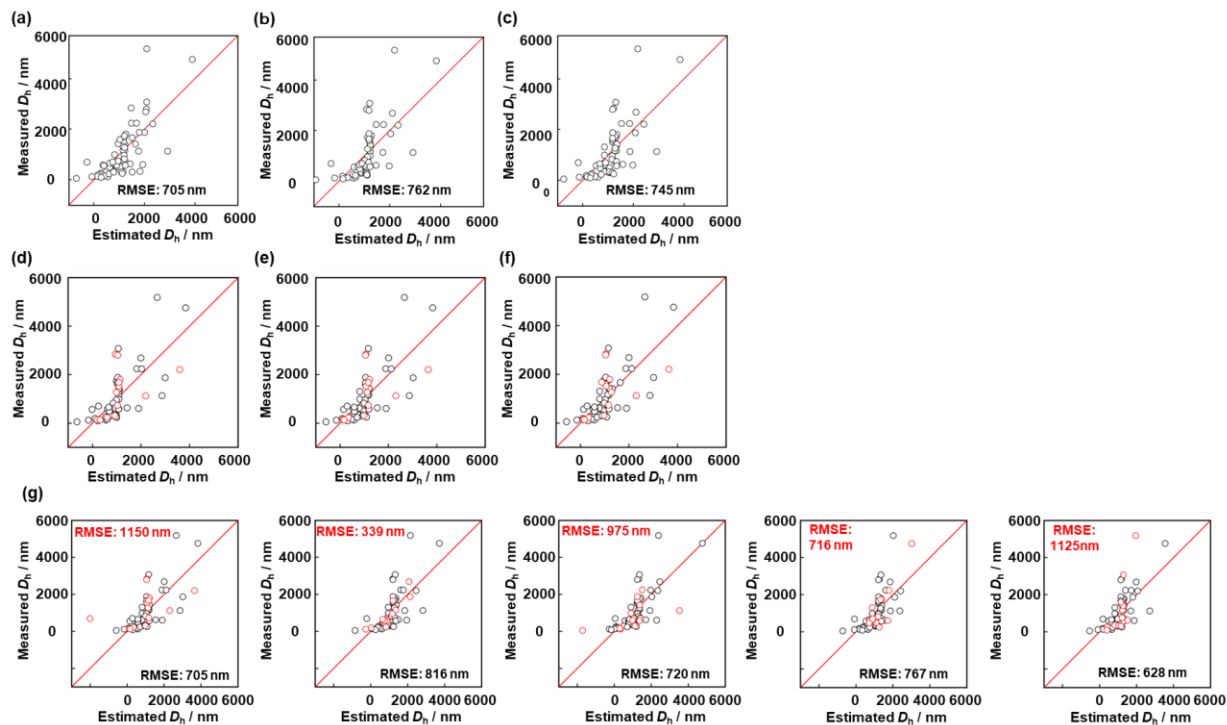

**Figure S5.** Model construction processes for  $y_2$ . (a–c) Relationship between the estimated and measured  $D_h$  for the constructed models with the different descriptors: (a)  $x_1$ ,  $x_2$ ,  $x_3$ ,  $x_5$ ,  $x_6$ ,  $x_7$ ,  $x_8$ , and  $x_{10}$ . (b)  $x_2$ ,  $x_5$ ,  $x_6$ ,  $x_7$ , and  $x_{10}$ . (c)  $x_2$ ,  $x_3$ ,  $x_5$ ,  $x_6$ ,  $x_7$ , and  $x_{10}$ . (d–f) Relationship between the estimated and measured  $D_h$  for the model based on  $x_2$ ,  $x_5$ ,  $x_6$ ,  $x_7$ , and  $x_{10}$  (d) with only  $x_3$  (e) and both  $x_3$  and  $x_9$  (f) in the five-fold cross validation. (g) Relationship between estimated and measured  $D_h$  in five-fold cross validation of  $y_2$  predictor ( $x_2$ ,  $x_3$ ,  $x_5$ ,  $x_6$ ,  $x_7$ , and  $x_{10}$ ) using the five different training (black) and test (red) datasets.

For  $y_2$ , the descriptors  $x_1$ ,  $x_2$ ,  $x_3$ ,  $x_5$ ,  $x_6$ ,  $x_7$ ,  $x_8$ , and  $x_{10}$  were extracted based on the weight diagram (Fig. 3b and Fig. S5a). Then, the descriptors  $x_2$ ,  $x_5$ ,  $x_6$ ,  $x_7$ , and  $x_{10}$  were selected based on our chemical insight considering the mechanism of precipitation polymerization (Fig. S5b). The descriptor  $x_3$  was added to  $x_2$ ,  $x_5$ ,  $x_6$ ,  $x_7$ , and  $x_{10}$  (Fig. S5c). The five-fold cross validation was performed in the following combinations to select the additional preferred descriptors ( $x_3$ ,  $x_9$ ):  $x_2$ ,  $x_5$ ,  $x_6$ ,  $x_7$ , and  $x_{10}$  (Fig. S5d),  $x_2$ ,  $x_3$ ,  $x_5$ ,  $x_6$ ,  $x_7$ , and  $x_{10}$  (Fig. S5e), and  $x_2$ ,  $x_3$ ,  $x_5$ ,  $x_6$ ,  $x_7$ ,  $x_9$ , and  $x_{10}$  (Fig. S5f). The average RMSE values of the training and test datasets were 744 and 904 nm for the model based on  $x_2$ ,  $x_5$ ,  $x_6$ ,  $x_7$ , and  $x_{10}$  (Fig. S5d), 727 and 861 nm for the model based on  $x_2$ ,  $x_3$ ,  $x_5$ ,  $x_6$ ,  $x_7$ , and  $x_{10}$  (Fig. S5e), and 725 and 865 nm for the model based on  $x_2$ ,  $x_3$ ,  $x_5$ ,  $x_6$ ,  $x_7$ ,  $x_9$ , and  $x_{10}$  (Fig. S5f), respectively. The model based on  $x_2$ ,  $x_3$ ,  $x_5$ ,  $x_6$ ,  $x_7$ , and  $x_{10}$  showed the minimum average RSEM value for the test data (Fig. S5e). Therefore, we finally determined the descriptors  $x_2$ ,  $x_3$ ,  $x_5$ ,  $x_6$ ,  $x_7$ , and  $x_{10}$  for  $y_2$  (Fig. 3d).

The five-fold cross validation was carried out using the same method as for  $y_2$ . The average RMSE values were  $727 \pm 63$  nm for the training data and  $861 \pm 303$  nm for the test data (Fig. S5g). The positive and negative correlations of the descriptors did not change depending on the model. Therefore, the extracted descriptor is suitable for predicting  $y_2$ .

(a) BIS 0.5 mol.% (25 °C, pH = 3)

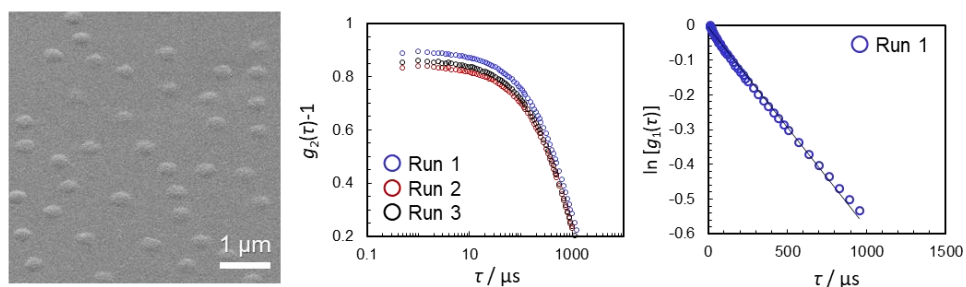

(b) BIS 1 mol.% (25 °C, pH = 3)

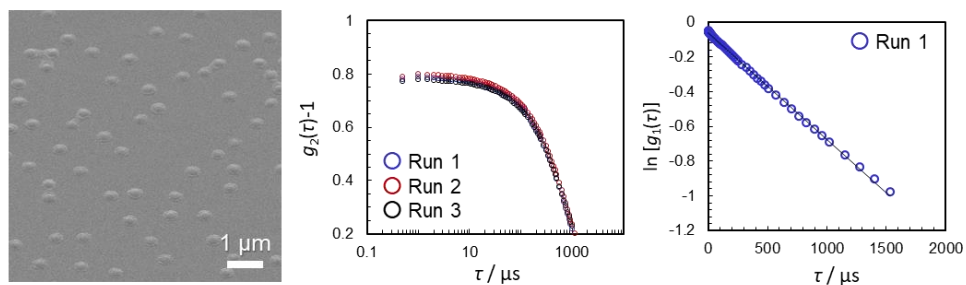

(c) BIS 6 mol.% (25 °C, pH = 3)

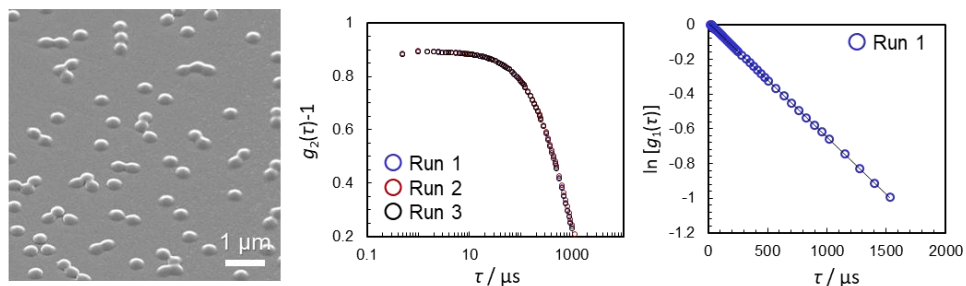

**Figure S6** In order to confirm the prediction model for  $y_2$ , additional experiments were conducted targeting a swollen microgel size ( $y_2$ ) of 500 nm. Representative SEM and FE-SEM images, time–correlation function of the scattering intensity,  $g_2(\tau)-1$ , and calculated time–correlation function of the scattering electric field,  $\ln[g_1(\tau)]$ , for each microgel ( $y_2$ ).

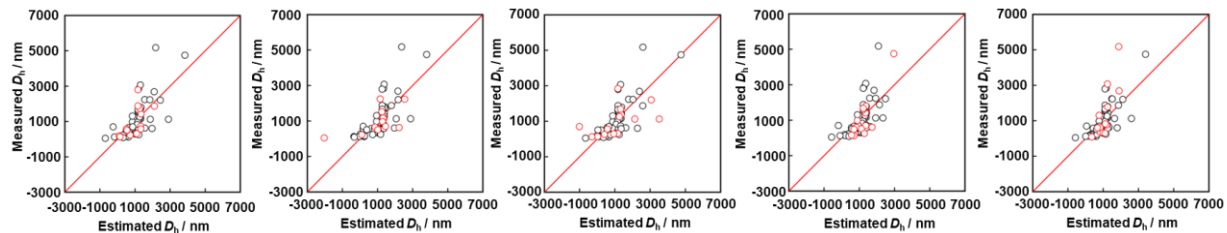

**Fig. S7.** Relationship between estimated and measured  $D_h$  in five-fold cross validation of  $y_2$  predictor using the dataset with adding the test data in Table 2.

The particles with the predicted  $y_2 = 500$  nm were synthesized in three different conditions (Table 2). The validation of the constructed models was carried out by five-fold cross validation, a common method in data science, with the addition of the resultant data (Fig. S6). The test data was added to the original training data. The dataset was randomly divided into the five groups to perform five-fold cross validation. The average RMSE value was  $712 \pm 59$  nm for the training data (black) and  $868 \pm 196$  nm for the test data (red). These average RMSE values were close to  $727 \pm 63$  nm for the training data and  $861 \pm 303$  nm for the test data using original training dataset (Fig. S5g). Therefore, the model has general applicability to predict the particle size.

## References

- S1. Y. Igarashi, H. Takenaka, Y. Nakanishi-Ohno, M. Uemura, S. Ikeda and M. Okada, *J. Phys. Soc. Jpn.*, 2018, **87**, 044802.
- S2. H. Minato, M. Takizawa, S. Hiroshige and D. Suzuki, *Langmuir*, 2019, **35**, 10412-10423.
